# Supplementary material for: Stable Membrane-Association of mRNAs in Etiolated, Greening and Mature Plastids
Source: MDPI journal article supplement (doi:10.3390/ijms18091881), 2017-08-31
Supplement: s1 [file s1]

Table S1: microarray data for mRNAs extracted from chloroplast membrane and stroma fractions from three different tissues

|                   |                   |                             |                           | mature (long-day conditions) |                                          |                                          |                                        | greening                |                                          |                                          |                                                  |                                        | etiolated               |                                          |                                          |                                                  |                                        |
|-------------------|-------------------|-----------------------------|---------------------------|------------------------------|------------------------------------------|------------------------------------------|----------------------------------------|-------------------------|------------------------------------------|------------------------------------------|--------------------------------------------------|----------------------------------------|-------------------------|------------------------------------------|------------------------------------------|--------------------------------------------------|----------------------------------------|
| probe name        | position on array | start of probe <sup>1</sup> | end of probe <sup>1</sup> | spot count <sup>2</sup>      | Median (F635 Median - B635) <sup>3</sup> | Median (F532 Median - B532) <sup>3</sup> | Membrane enrichment value <sup>4</sup> | spot count <sup>2</sup> | Median (F635 Median - B635) <sup>3</sup> | Median (F532 Median - B532) <sup>3</sup> | Median (Median of Ratios (635/532)) <sup>4</sup> | Membrane enrichment value <sup>4</sup> | spot count <sup>2</sup> | Median (F635 Median - B635) <sup>3</sup> | Median (F532 Median - B532) <sup>3</sup> | Median (Median of Ratios (635/532)) <sup>4</sup> | Membrane enrichment value <sup>4</sup> |
| psbA 3'           | 1                 | 36                          | 336                       | 48                           | 4848.5                                   | 6626.5                                   | 2.528                                  | 42                      | 3069.5                                   | 7437                                     | 0.6235                                           | 2.43165                                | 48                      | 1748.5                                   | 4023.5                                   | 0.2495                                           | 1.27245                                |
| psbA              | 2                 | 296                         | 1074                      | 48                           | 17691                                    | 15278.5                                  | 0.988                                  | 36                      | 13168                                    | 16763                                    | 0.6125                                           | 2.38875                                | 48                      | 13599                                    | 27718.5                                  | 0.4                                              | 2.04                                   |
| psbA 5'           | 3                 | 973                         | 1421                      | 47                           | 7281                                     | 4402                                     | 0.987                                  | 42                      | 12778.5                                  | 17856.5                                  | 0.7255                                           | 2.82945                                | 48                      | 7407.5                                   | 27635                                    | 0.3025                                           | 1.54275                                |
| trnKex2-in        | 4                 | 1261                        | 1710                      | 48                           | 3485                                     | 2085                                     | 2.739                                  | 35                      | 5220                                     | 11860                                    | 0.507                                            | 1.9773                                 | 43                      | 3972                                     | 17712                                    | 0.218                                            | 1.1118                                 |
| matK              | 5                 | 1677                        | 3308                      | 24                           | 1526.5                                   | 2250.5                                   | 0.756                                  | 32                      | 2142.5                                   | 1417                                     | 0.7                                              | 2.73                                   | 26                      | 967                                      | 5214                                     | 0.2135                                           | 1.08885                                |
| trnKin-ex1        | 6                 | 3185                        | 4197                      | 48                           | 2663.5                                   | 2378                                     | 3.1135                                 | 36                      | 2154                                     | 1960                                     | 0.5545                                           | 2.16255                                | 48                      | 2532                                     | 4922                                     | 0.4585                                           | 2.33835                                |
| lG-rps16 ex2      | 7                 | 4085                        | 4712                      | 48                           | 1327                                     | 800                                      | 2.2465                                 | 42                      | 495.5                                    | 2012.5                                   | 0.4615                                           | 1.79985                                | 48                      | 1487.5                                   | 3783.5                                   | 0.2695                                           | 1.37445                                |
| rps16 full        | 8                 | 4521                        | 5916                      | 48                           | 2163                                     | 1997.5                                   | 2.146                                  | 42                      | 1485                                     | 2754.5                                   | 0.495                                            | 1.9305                                 | 48                      | 1362.5                                   | 3977                                     | 0.438                                            | 2.2338                                 |
| rps16 in          | 9                 | 4751                        | 5561                      | 45                           | 1359                                     | 1916                                     | 0.87                                   | 27                      | 1265                                     | 1116                                     | 0.66                                             | 2.574                                  | 45                      | 880                                      | 3227                                     | 0.66                                             | 3.366                                  |
| lG rps16-trnQ     | 10                | 5541                        | 6816                      | 48                           | 1402.5                                   | 2518                                     | 2.0295                                 | 42                      | 753.5                                    | 2176                                     | 0.348                                            | 1.3572                                 | 48                      | 2272                                     | 4888.5                                   | 0.2845                                           | 1.45095                                |
| trnQ              | 11                | 6724                        | 6966                      | 48                           | 1458                                     | 6007                                     | 0.252                                  | 39                      | 5440                                     | 31509                                    | 0.219                                            | 0.8541                                 | 48                      | 4439                                     | 20701                                    | 0.104                                            | 0.5304                                 |
| lG-psbK           | 12                | 6929                        | 7380                      | 48                           | 4072                                     | 989                                      | 4.6595                                 | 42                      | 1391                                     | 3018                                     | 0.6135                                           | 2.39265                                | 48                      | 4009                                     | 5702                                     | 0.66                                             | 3.366                                  |
| psbK-psbI         | 13                | 7177                        | 7881                      | 48                           | 5922                                     | 4227                                     | 4.646                                  | 41                      | 4249                                     | 4839                                     | 0.674                                            | 2.6286                                 | 48                      | 4573                                     | 6763.5                                   | 0.76                                             | 3.876                                  |
| psbI              | 14                | 7709                        | 7976                      | 48                           | 2042                                     | 1223                                     | 3.3535                                 | 45                      | 1427                                     | 1587                                     | 0.695                                            | 2.7105                                 | 48                      | 2465                                     | 4187                                     | 0.7195                                           | 3.66945                                |
| trnS-GCU          | 15                | 7942                        | 8842                      | 48                           | 3852.5                                   | 3454.5                                   | 1.6765                                 | 42                      | 11231                                    | 16580.5                                  | 0.5125                                           | 1.99875                                | 48                      | 4453.5                                   | 12017.5                                  | 0.209                                            | 1.0659                                 |
| psbD 5'           | 16                | 8739                        | 9862                      | 47                           | 9091                                     | 1476                                     | 11.89                                  | 39                      | 12515                                    | 6027                                     | 1.33                                             | 5.187                                  | 48                      | 5115.5                                   | 5875                                     | 1.3595                                           | 6.93345                                |
| psbD-psbC         | 17                | 9759                        | 10826                     | 48                           | 9924.5                                   | 1253                                     | 7.0435                                 | 42                      | 6677                                     | 3630.5                                   | 1.502                                            | 5.8578                                 | 48                      | 4189                                     | 1585.5                                   | 1.584                                            | 8.0784                                 |
| psbC-trnS         | 18                | 10694                       | 11758                     | 48                           | 6183                                     | 3038.5                                   | 3.3575                                 | 42                      | 3906.5                                   | 4005.5                                   | 0.794                                            | 3.0966                                 | 48                      | 2430.5                                   | 3359                                     | 0.459                                            | 2.3409                                 |
| trnS-UGA          | 19                | 11661                       | 12000                     | 48                           | 2771.5                                   | 6778                                     | 1.1455                                 | 42                      | 3203                                     | 11825                                    | 0.2805                                           | 1.09395                                | 48                      | 2072.5                                   | 8482.5                                   | 0.134                                            | 0.6834                                 |
| psbZ              | 20                | 11896                       | 12411                     | 48                           | 4546                                     | 1091                                     | 11.53                                  | 33                      | 6993                                     | 1144                                     | 1.37                                             | 5.343                                  | 48                      | 2219.5                                   | 1617.5                                   | 1.131                                            | 5.7681                                 |
| psbZ-trnG-GCC     | 21                | 11980                       | 12883                     | 48                           | 789                                      | 207                                      | 4.488                                  | 31                      | 2758                                     | 1057                                     | 0.91                                             | 3.549                                  | 35                      | 543                                      | 804                                      | 0.439                                            | 2.2389                                 |
| trnG-GCC          | 22                | 12431                       | 12626                     | 47                           | 1250                                     | 1127                                     | 1.317                                  | 40                      | 700.5                                    | 2505                                     | 0.3255                                           | 1.26945                                | 40                      | 1674.5                                   | 6910                                     | 0.2465                                           | 1.25715                                |
| trnfM             | 23                | 12762                       | 13305                     | 48                           | 3234                                     | 10242                                    | 0.5845                                 | 42                      | 5979.5                                   | 21910.5                                  | 0.2935                                           | 1.14465                                | 48                      | 3400                                     | 17636.5                                  | 0.22                                             | 1.122                                  |
| trnfM-trnG-UCCex1 | 24                | 13050                       | 13239                     | 48                           | 964                                      | 3612                                     | 0.9055                                 | 45                      | 1557                                     | 4269                                     | 0.442                                            | 1.7238                                 | 48                      | 1431.5                                   | 6530.5                                   | 0.1985                                           | 1.01235                                |
| trnG-UCC full     | 25                | 13248                       | 14013                     | 48                           | 3747                                     | 8512                                     | 0.987                                  | 42                      | 3539.5                                   | 16622.5                                  | 0.312                                            | 1.2168                                 | 48                      | 2242                                     | 9363                                     | 0.126                                            | 0.6426                                 |

|                    |                   |                             |                           | mature (long-day conditions) |                                          |                                          |                                        | greening                |                                          |                                          |                                                  |                                        | etiolated               |                                          |                                          |                                                  |                                        |
|--------------------|-------------------|-----------------------------|---------------------------|------------------------------|------------------------------------------|------------------------------------------|----------------------------------------|-------------------------|------------------------------------------|------------------------------------------|--------------------------------------------------|----------------------------------------|-------------------------|------------------------------------------|------------------------------------------|--------------------------------------------------|----------------------------------------|
| probe name         | position on array | start of probe <sup>1</sup> | end of probe <sup>1</sup> | spot count <sup>2</sup>      | Median (F635 Median - B635) <sup>3</sup> | Median (F532 Median - B532) <sup>3</sup> | Membrane enrichment value <sup>4</sup> | spot count <sup>2</sup> | Median (F635 Median - B635) <sup>3</sup> | Median (F532 Median - B532) <sup>3</sup> | Median (Median of Ratios (635/532)) <sup>4</sup> | Membrane enrichment value <sup>4</sup> | spot count <sup>2</sup> | Median (F635 Median - B635) <sup>3</sup> | Median (F532 Median - B532) <sup>3</sup> | Median (Median of Ratios (635/532)) <sup>4</sup> | Membrane enrichment value <sup>4</sup> |
| trnG-UCC ex1-ORF69 | 26                | 13895                       | 14972                     | 48                           | 1220.5                                   | 2765                                     | 1.5555                                 | 42                      | 1452.5                                   | 2454.5                                   | 0.537                                            | 2.0943                                 | 48                      | 2083                                     | 3582                                     | 0.2835                                           | 1.44585                                |
| ORF69-IG           | 27                | 14561                       | 15500                     | 20                           | 654                                      | 1623.5                                   |                                        | 24                      | 1826.5                                   | 2079.5                                   | 0.723                                            | 2.8197                                 | 24                      | 385.5                                    | 1497                                     | 0.1825                                           | 0.93075                                |
| IG-trnT-GGU        | 28                | 14860                       | 16001                     | 39                           | 784                                      | 5829                                     | 0.394                                  | 41                      | 703                                      | 2517                                     | 0.268                                            | 1.0452                                 | 48                      | 665.5                                    | 2335                                     | 0.208                                            | 1.0608                                 |
| trnT-GGU           | 29                | 15885                       | 16001                     | 14                           | 1417                                     | 3464.5                                   |                                        | 22                      | 1500                                     | 2507                                     |                                                  |                                        | 24                      | 411.5                                    | 8558                                     | 0.1265                                           | 0.64515                                |
| IG-trnT-GGU-IG     | 30                | 15885                       | 16487                     | 39                           | 618                                      | 2077                                     | 0.379                                  | 26                      | 473                                      | 2484.5                                   | 0.251                                            | 0.9789                                 | 44                      | 413.5                                    | 2478                                     | 0.288                                            | 1.4688                                 |
| trnE-UCC           | 31                | 16391                       | 17004                     | 48                           | 1575                                     | 16491.5                                  | 0.3885                                 | 42                      | 3688                                     | 23395                                    | 0.175                                            | 0.6825                                 | 47                      | 3710                                     | 20759                                    | 0.096                                            | 0.4896                                 |
| trnE-UCC-trnY-GUA  | 32                | 16391                       | 16580                     | 48                           | 2011.5                                   | 17838.5                                  | 0.3155                                 | 36                      | 5314                                     | 34491.5                                  | 0.196                                            | 0.7644                                 | 48                      | 3209.5                                   | 20829                                    | 0.102                                            | 0.5202                                 |
| psbM-IG            | 33                | 18178                       | 18681                     | 38                           | 1654.5                                   | 1296.5                                   | 2.246                                  | 30                      | 2091.5                                   | 3661                                     | 0.4995                                           | 1.94805                                | 38                      | 1515.5                                   | 4521                                     | 0.3375                                           | 1.72125                                |
| IG psbM-petN       | 34                | 18541                       | 19090                     | 48                           | 861                                      | 1800.5                                   | 1.016                                  | 36                      | 986                                      | 1935                                     | 0.4515                                           | 1.76085                                | 48                      | 1266                                     | 4013.5                                   | 0.573                                            | 2.9223                                 |
| petN               | 35                | 19081                       | 19186                     | 48                           | 2421.5                                   | 1985                                     | 1.2615                                 | 42                      | 1351                                     | 5052                                     | 0.332                                            | 1.2948                                 | 48                      | 1272.5                                   | 1575                                     | 0.381                                            | 1.9431                                 |
| petN-IG            | 36                | 19081                       | 19396                     | 48                           | 1443                                     | 3068                                     | 1.133                                  | 37                      | 762                                      | 2385                                     | 0.36                                             | 1.404                                  | 47                      | 1341                                     | 2302                                     | 0.37                                             | 1.887                                  |
| IG-trnC-IG         | 37                | 19381                       | 20368                     | 29                           | 261                                      | 1095                                     | 0.435                                  | 25                      | 342                                      | 1015                                     | 0.595                                            | 2.3205                                 | 27                      | 158                                      | 1150                                     | 0.211                                            | 1.0761                                 |
| trnC IG            | 38                | 20140                       | 20368                     | 48                           | 768.5                                    | 4969.5                                   | 0.4545                                 | 38                      | 1879.5                                   | 8494.5                                   | 0.333                                            | 1.2987                                 | 48                      | 1773.5                                   | 10756.5                                  | 0.1015                                           | 0.51765                                |
| IG trnC-rpoB       | 39                | 20221                       | 21475                     | 23                           | 322                                      | 1096                                     |                                        | 19                      | 1376                                     | 3038                                     |                                                  |                                        | 25                      | 496                                      | 2787                                     | 0.454                                            | 2.3154                                 |
| rpoB 5'            | 40                | 21380                       | 22732                     | 23                           | 566                                      | 1452                                     |                                        | 20                      | 715                                      | 1175                                     |                                                  |                                        | 28                      | 326                                      | 1054                                     | 0.609                                            | 3.1059                                 |
| rpoB-1             | 41                | 22638                       | 23370                     | 20                           | 611                                      | 1443                                     |                                        | 20                      | 1306                                     | 3646                                     |                                                  |                                        | 19                      | 140                                      | 944                                      |                                                  |                                        |
| rpoB-2             | 42                | 23258                       | 24475                     | 23                           | 782                                      | 1733                                     |                                        | 21                      | 415                                      | 1623                                     |                                                  |                                        | 32                      | 741.5                                    | 1227.5                                   | 0.6245                                           | 3.18495                                |
| rpoB-rpoC1         | 43                | 24377                       | 25937                     | 14                           | 325.5                                    | 795                                      |                                        | 14                      | 690.5                                    | 1458                                     |                                                  |                                        | 20                      | 59.5                                     | 358.5                                    |                                                  |                                        |
| rpoC1 3'           | 44                | 25831                       | 27000                     | 21                           | 355                                      | 1006                                     |                                        | 18                      | 695                                      | 1945                                     |                                                  |                                        | 22                      | 143                                      | 901                                      |                                                  |                                        |
| rpoC1-rpoC2        | 45                | 26739                       | 27040                     | 18                           | 396                                      | 1129                                     |                                        | 19                      | 2071                                     | 3534                                     |                                                  |                                        | 20                      | 179.5                                    | 991                                      |                                                  |                                        |
| rpoC2 5'           | 46                | 26906                       | 28192                     | 20                           | 399.5                                    | 1005.5                                   |                                        | 20                      | 1266                                     | 2715.5                                   |                                                  |                                        | 22                      | 118                                      | 697                                      |                                                  |                                        |
| rpoC2-1            | 47                | 28094                       | 29747                     | 24                           | 546                                      | 1973                                     | 0.3325                                 | 21                      | 2191                                     | 4748                                     |                                                  |                                        | 26                      | 194.5                                    | 1126.5                                   | 0.239                                            | 1.2189                                 |
| rpoC2-2            | 48                | 29641                       | 31009                     | 19                           | 525                                      | 1148                                     |                                        | 21                      | 868                                      | 1988                                     |                                                  |                                        | 22                      | 185                                      | 1045                                     |                                                  |                                        |
| rpoC2-rps2         | 49                | 30904                       | 32066                     | 48                           | 1156                                     | 628                                      | 2.3105                                 | 22                      | 5170.5                                   | 4823.5                                   |                                                  |                                        | 38                      | 1352                                     | 3687.5                                   | 0.724                                            | 3.6924                                 |
| IG-rps2            | 50                | 31541                       | 32484                     | 48                           | 1809.5                                   | 632.5                                    | 3.036                                  | 32                      | 2247.5                                   | 3228                                     | 0.9715                                           | 3.78885                                | 40                      | 2120                                     | 3614.5                                   | 0.7285                                           | 3.71535                                |
| rps2               | 51                | 31951                       | 32697                     | 48                           | 2170                                     | 695.5                                    | 4.9455                                 | 30                      | 5099                                     | 1471.5                                   | 1.3705                                           | 5.34495                                | 44                      | 1902                                     | 2329.5                                   | 1.174                                            | 5.9874                                 |

|                 |                   |                             |                           | mature (long-day conditions) |                                          |                                          |                                        | greening                |                                          |                                          |                                                  |                                        | etiolated               |                                          |                                          |                                                  |                                        |
|-----------------|-------------------|-----------------------------|---------------------------|------------------------------|------------------------------------------|------------------------------------------|----------------------------------------|-------------------------|------------------------------------------|------------------------------------------|--------------------------------------------------|----------------------------------------|-------------------------|------------------------------------------|------------------------------------------|--------------------------------------------------|----------------------------------------|
| probe name      | position on array | start of probe <sup>1</sup> | end of probe <sup>1</sup> | spot count <sup>2</sup>      | Median (F635 Median - B635) <sup>3</sup> | Median (F532 Median - B532) <sup>3</sup> | Membrane enrichment value <sup>4</sup> | spot count <sup>2</sup> | Median (F635 Median - B635) <sup>3</sup> | Median (F532 Median - B532) <sup>3</sup> | Median (Median of Ratios (635/532)) <sup>4</sup> | Membrane enrichment value <sup>4</sup> | spot count <sup>2</sup> | Median (F635 Median - B635) <sup>3</sup> | Median (F532 Median - B532) <sup>3</sup> | Median (Median of Ratios (635/532)) <sup>4</sup> | Membrane enrichment value <sup>4</sup> |
| IG-atpl         | 52                | 32585                       | 32930                     | 37                           | 5746                                     | 7049                                     | 2.778                                  | 42                      | 10148.5                                  | 5941.5                                   | 1.1355                                           | 4.42845                                | 37                      | 4266                                     | 13077                                    | 0.929                                            | 4.7379                                 |
| atpl-1          | 53                | 32820                       | 33563                     | 48                           | 5553.5                                   | 3062.5                                   | 6.412                                  | 42                      | 2680                                     | 3287.5                                   | 0.8385                                           | 3.27015                                | 48                      | 5374.5                                   | 8076.5                                   | 0.72                                             | 3.672                                  |
| atpl-2          | 54                | 32820                       | 33563                     | 48                           | 5617                                     | 1131.5                                   | 5.861                                  | 42                      | 1793.5                                   | 2091                                     | 0.9615                                           | 3.74985                                | 48                      | 2429.5                                   | 3114                                     | 1.1225                                           | 5.72475                                |
| IG-atpH         | 55                | 34031                       | 34610                     | 48                           | 7760.5                                   | 4117.5                                   | 4.8825                                 | 42                      | 4776                                     | 7927.5                                   | 0.8675                                           | 3.38325                                | 48                      | 5470                                     | 1883                                     | 1.299                                            | 6.6249                                 |
| atpH-IG         | 56                | 34361                       | 35021                     | 48                           | 6630                                     | 2212.5                                   | 4.1625                                 | 42                      | 3051.5                                   | 3621.5                                   | 0.787                                            | 3.0693                                 | 48                      | 4425.5                                   | 6719.5                                   | 1.0135                                           | 5.16885                                |
| atpH-atpFex1-in | 57                | 34473                       | 35705                     | 48                           | 5725                                     | 4041.5                                   | 4.56                                   | 42                      | 2393.5                                   | 5539.5                                   | 0.6985                                           | 2.72415                                | 48                      | 3125                                     | 5537.5                                   | 0.925                                            | 4.7175                                 |
| atpFex1-1       | 58                | 34941                       | 35385                     | 48                           | 3109.5                                   | 1377                                     | 4.2875                                 | 31                      | 1556                                     | 3256                                     | 0.671                                            | 2.6169                                 | 48                      | 1300                                     | 2503.5                                   | 0.7585                                           | 3.86835                                |
| atpFin          | 59                | 34941                       | 35385                     | 48                           | 1164                                     | 783                                      | 4.49                                   | 28                      | 2017.5                                   | 911                                      | 0.848                                            | 3.3072                                 | 39                      | 907                                      | 2121                                     | 1.041                                            | 5.3091                                 |
| atpFin-ex2      | 60                | 35232                       | 35815                     | 48                           | 4530.5                                   | 2526                                     | 5.3175                                 | 42                      | 3586                                     | 2689.5                                   | 0.812                                            | 3.1668                                 | 48                      | 3777                                     | 1485.5                                   | 0.9265                                           | 4.72515                                |
| atpFex1-2       | 61                | 35706                       | 36593                     | 48                           | 7966.5                                   | 3362                                     | 1.4465                                 | 41                      | 7035                                     | 8346                                     | 0.965                                            | 3.7635                                 | 48                      | 6614.5                                   | 6619                                     | 0.8705                                           | 4.43955                                |
| atpA-5'         | 62                | 36590                       | 37680                     | 48                           | 2097.5                                   | 918                                      | 1.1445                                 | 42                      | 1214                                     | 1100                                     | 0.724                                            | 2.8236                                 | 48                      | 2184                                     | 3883                                     | 0.8635                                           | 4.40385                                |
| atpA            | 63                | 37398                       | 37921                     | 48                           | 1761.5                                   | 277.5                                    | 5.112                                  | 31                      | 2268                                     | 829                                      | 1                                                | 3.9                                    | 43                      | 1243                                     | 2169                                     | 1.106                                            | 5.6406                                 |
| atpA-3'         | 64                | 37781                       | 38301                     | 48                           | 3595                                     | 3197                                     | 3.7275                                 | 42                      | 1335                                     | 7670.5                                   | 0.3595                                           | 1.40205                                | 48                      | 3088                                     | 6651.5                                   | 0.3445                                           | 1.75695                                |
| trnR-rps14      | 65                | 38106                       | 39060                     | 48                           | 4440                                     | 2946.5                                   | 3.0395                                 | 42                      | 5580                                     | 7056.5                                   | 0.656                                            | 2.5584                                 | 48                      | 2086.5                                   | 6792                                     | 0.2795                                           | 1.42545                                |
| rps14           | 66                | 38500                       | 39020                     | 48                           | 17247                                    | 5941.5                                   | 12.4585                                | 41                      | 18351                                    | 7475                                     | 1.924                                            | 7.5036                                 | 48                      | 17205                                    | 10917.5                                  | 1.4515                                           | 7.40265                                |
| rps14-psaB      | 67                | 38929                       | 39260                     | 48                           | 24395                                    | 10869.5                                  | 11.4355                                | 42                      | 30300.5                                  | 12334.5                                  | 1.427                                            | 5.5653                                 | 48                      | 11962.5                                  | 10893                                    | 1.2385                                           | 6.31635                                |
| psaB-1          | 68                | 39935                       | 41083                     | 48                           | 7478.5                                   | 607.5                                    | 12.043                                 | 42                      | 5111.5                                   | 2627                                     | 1.848                                            | 7.2072                                 | 48                      | 5506                                     | 4127                                     | 1.749                                            | 8.9199                                 |
| psaB-2          | 69                | 40721                       | 41090                     | 48                           | 5593.5                                   | 819                                      | 8.0185                                 | 42                      | 3744.5                                   | 2840                                     | 0.9795                                           | 3.82005                                | 48                      | 6489.5                                   | 1192.5                                   | 1.491                                            | 7.6041                                 |
| psaB-psaA       | 70                | 40978                       | 42044                     | 48                           | 13052.5                                  | 1980                                     | 12.3                                   | 42                      | 9618.5                                   | 3127                                     | 1.9815                                           | 7.72785                                | 48                      | 9285                                     | 6710.5                                   | 2.1255                                           | 10.84005                               |
| psaA            | 71                | 41919                       | 42984                     | 48                           | 10018                                    | 2498.5                                   | 12.74                                  | 42                      | 5036                                     | 3115.5                                   | 1.622                                            | 6.3258                                 | 48                      | 6624                                     | 7148.5                                   | 1.69                                             | 8.619                                  |
| psaA-3'         | 72                | 42883                       | 43907                     | 48                           | 8093                                     | 2109                                     | 2.126                                  | 42                      | 6945                                     | 2133.5                                   | 1.527                                            | 5.9553                                 | 48                      | 5157.5                                   | 3836                                     | 1.587                                            | 8.0937                                 |
| IG-ycf3ex3-in2  | 73                | 43801                       | 44873                     | 48                           | 1132                                     | 256.5                                    | 2.7945                                 | 24                      | 4148.5                                   | 2582                                     | 1.215                                            | 4.7385                                 | 44                      | 1029                                     | 1388.5                                   | 0.879                                            | 4.4829                                 |
| ycf3in2         | 74                | 44290                       | 45121                     | 48                           | 1853.5                                   | 682.5                                    | 3.251                                  | 39                      | 764                                      | 1220                                     | 0.871                                            | 3.3969                                 | 48                      | 1309                                     | 2405                                     | 0.547                                            | 2.7897                                 |
| ycf3ex2-in1     | 75                | 45010                       | 46084                     | 48                           | 1669.5                                   | 609                                      | 3.28                                   | 35                      | 1838                                     | 1348                                     | 0.83                                             | 3.237                                  | 48                      | 1650.5                                   | 2935                                     | 0.6345                                           | 3.23595                                |
| ycf3in1-ex1     | 76                | 45820                       | 46220                     | 38                           | 2834                                     | 463                                      | 5.744                                  | 30                      | 1174.5                                   | 2379                                     | 0.854                                            | 3.3306                                 | 35                      | 2450                                     | 8755                                     | 0.475                                            | 2.4225                                 |
| ycf3in1-ex1-IG  | 77                | 45982                       | 46520                     | 48                           | 861.5                                    | 637.5                                    | 2.606                                  | 22                      | 11341                                    | 11578.5                                  |                                                  |                                        | 47                      | 865                                      | 3655                                     | 0.616                                            | 3.1416                                 |
| trnS-UCC-rps4-1 | 78                | 46461                       | 47337                     | 48                           | 977.5                                    | 2408                                     | 1.281                                  | 42                      | 778.5                                    | 2283                                     | 0.43                                             | 1.677                                  | 48                      | 1969.5                                   | 3731                                     | 0.3235                                           | 1.64985                                |

|                   |                      |                                |                              | mature (long-day conditions) |                                                   |                                                   |                                              | greening                   |                                                   |                                                   |                                                           |                                              | etiolated                  |                                                   |                                                   |                                                           |                                              |
|-------------------|----------------------|--------------------------------|------------------------------|------------------------------|---------------------------------------------------|---------------------------------------------------|----------------------------------------------|----------------------------|---------------------------------------------------|---------------------------------------------------|-----------------------------------------------------------|----------------------------------------------|----------------------------|---------------------------------------------------|---------------------------------------------------|-----------------------------------------------------------|----------------------------------------------|
| probe name        | position<br>on array | start of<br>probe <sup>1</sup> | end of<br>probe <sup>1</sup> | spot<br>count <sup>2</sup>   | Median<br>(F635<br>Median -<br>B635) <sup>3</sup> | Median<br>(F532<br>Median -<br>B532) <sup>3</sup> | Membrane<br>enrichment<br>value <sup>4</sup> | spot<br>count <sup>2</sup> | Median<br>(F635<br>Median -<br>B635) <sup>3</sup> | Median<br>(F532<br>Median -<br>B532) <sup>3</sup> | Median<br>(Median of<br>Ratios<br>(635/532)) <sup>4</sup> | Membrane<br>enrichment<br>value <sup>4</sup> | spot<br>count <sup>2</sup> | Median<br>(F635<br>Median -<br>B635) <sup>3</sup> | Median<br>(F532<br>Median -<br>B532) <sup>3</sup> | Median<br>(Median of<br>Ratios<br>(635/532)) <sup>4</sup> | Membrane<br>enrichment<br>value <sup>4</sup> |
| trnS-UCC-rps4-2   | 79                   | 46700                          | 47229                        | 42                           | 686                                               | 4020                                              | 0.723                                        | 42                         | 859                                               | 3432.5                                            | 0.421                                                     | 1.6419                                       | 47                         | 1888                                              | 5774                                              | 0.152                                                     | 0.7752                                       |
| rps4-IG           | 80                   | 47230                          | 48071                        | 48                           | 1571                                              | 1020.5                                            | 3.6635                                       | 41                         | 842                                               | 1514                                              | 0.745                                                     | 2.9055                                       | 48                         | 1453                                              | 2714.5                                            | 0.8035                                                    | 4.09785                                      |
| trnT-UGU          | 81                   | 47975                          | 48660                        | 48                           | 672                                               | 2274                                              | 0.853                                        | 42                         | 842.5                                             | 2524                                              | 0.2875                                                    | 1.12125                                      | 47                         | 1478                                              | 1904                                              | 0.157                                                     | 0.8007                                       |
| trnT-UGU-IG       | 82                   | 48066                          | 48215                        | 47                           | 1783                                              | 3694                                              | 0.477                                        | 42                         | 5990                                              | 20840.5                                           | 0.373                                                     | 1.4547                                       | 48                         | 6419.5                                            | 10962.5                                           | 0.142                                                     | 0.7242                                       |
| IG-trnL-UAAex1    | 83                   | 48481                          | 49020                        | 48                           | 2261.5                                            | 7291                                              | 1.301                                        | 42                         | 7323                                              | 15965                                             | 0.5625                                                    | 2.19375                                      | 48                         | 4268.5                                            | 9981                                              | 0.14                                                      | 0.714                                        |
| trnL-UAAex1-in    | 84                   | 48890                          | 49471                        | 42                           | 437.5                                             | 3999.5                                            | 0.6905                                       | 42                         | 528                                               | 1687                                              | 0.333                                                     | 1.2987                                       | 48                         | 1156.5                                            | 3691.5                                            | 0.3185                                                    | 1.62435                                      |
| trnL-UAAin-ex2-IG | 85                   | 49339                          | 49720                        | 48                           | 1752                                              | 4041                                              | 1.185                                        | 40                         | 2193.5                                            | 4995                                              | 0.431                                                     | 1.6809                                       | 48                         | 1269                                              | 4659.5                                            | 0.1625                                                    | 0.82875                                      |
| trnL-UAAex2-trnF  | 86                   | 49471                          | 50041                        | 48                           | 2259                                              | 3026                                              | 2.034                                        | 42                         | 1584.5                                            | 3895.5                                            | 0.579                                                     | 2.2581                                       | 48                         | 1821                                              | 3291.5                                            | 0.3625                                                    | 1.84875                                      |
| trnF              | 87                   | 49872                          | 49945                        | 48                           | 908                                               | 2171                                              | 0.439                                        | 40                         | 1186                                              | 7465                                              | 0.115                                                     | 0.4485                                       | 48                         | 1222.5                                            | 7896.5                                            | 0.18                                                      | 0.918                                        |
| trnF-ndhJ         | 88                   | 50021                          | 50610                        | 48                           | 907.5                                             | 358                                               | 2.4975                                       | 30                         | 1912                                              | 889                                               | 1.022                                                     | 3.9858                                       | 44                         | 678                                               | 1323                                              | 0.996                                                     | 5.0796                                       |
| ndhJ              | 89                   | 50461                          | 51020                        | 48                           | 3121                                              | 770                                               | 1.674                                        | 39                         | 1206                                              | 1507                                              | 0.762                                                     | 2.9718                                       | 48                         | 2735.5                                            | 5585.5                                            | 0.578                                                     | 2.9478                                       |
| ndhJ-ndhK         | 90                   | 50981                          | 51360                        | 46                           | 3180.5                                            | 1594.5                                            | 1.627                                        | 42                         | 741                                               | 1914.5                                            | 0.693                                                     | 2.7027                                       | 47                         | 1627                                              | 6566                                              | 0.605                                                     | 3.0855                                       |
| ndhK-ndhC         | 91                   | 51275                          | 51931                        | 48                           | 1350.5                                            | 533.5                                             | 3.128                                        | 41                         | 1003                                              | 1883                                              | 0.686                                                     | 2.6754                                       | 48                         | 1668.5                                            | 2931                                              | 0.5975                                                    | 3.04725                                      |
| ndhC-IG           | 92                   | 51796                          | 52859                        | 48                           | 1939                                              | 892.5                                             | 3.5445                                       | 37                         | 1219                                              | 1288                                              | 0.86                                                      | 3.354                                        | 48                         | 1072                                              | 1815                                              | 0.882                                                     | 4.4982                                       |
| IG-trnVex2-in     | 93                   | 52711                          | 53491                        | 48                           | 756.5                                             | 895.5                                             | 1.7045                                       | 26                         | 1444                                              | 911                                               | 0.916                                                     | 3.5724                                       | 42                         | 473                                               | 1629.5                                            | 0.5525                                                    | 2.81775                                      |
| trnVex2-in-ex1    | 94                   | 53158                          | 53834                        | 42                           | 6309.5                                            | 12281                                             | 0.51                                         | 42                         | 3211                                              | 7151.5                                            | 0.4675                                                    | 1.82325                                      | 48                         | 3052                                              | 9243.5                                            | 0.2035                                                    | 1.03785                                      |
| trnVin-ex1-IG     | 95                   | 53561                          | 53990                        | 47                           | 4036                                              | 11309                                             | 0.469                                        | 42                         | 4387                                              | 6047.5                                            | 0.533                                                     | 2.0787                                       | 48                         | 2862.5                                            | 8801                                              | 0.216                                                     | 1.1016                                       |
| trnM              | 96                   | 53838                          | 54202                        | 48                           | 2250                                              | 12346                                             | 0.6705                                       | 41                         | 3632                                              | 27757                                             | 0.288                                                     | 1.1232                                       | 48                         | 2877                                              | 11469                                             | 0.1365                                                    | 0.69615                                      |
| trnM-atpE-atpB    | 97                   | 54098                          | 54690                        | 48                           | 1174.5                                            | 273.5                                             | 3.4675                                       | 20                         | 3098                                              | 4895.5                                            |                                                           |                                              | 26                         | 350.5                                             | 1648                                              | 0.3115                                                    | 1.58865                                      |
| atpB              | 98                   | 54591                          | 55790                        | 48                           | 3715                                              | 1353.5                                            | 4.335                                        | 39                         | 2211                                              | 2166                                              | 0.565                                                     | 2.2035                                       | 47                         | 1184                                              | 2350                                              | 1.154                                                     | 5.8854                                       |
| atpB 5'           | 99                   | 55692                          | 56410                        | 36                           | 5766.5                                            | 672.5                                             | 9.0125                                       | 29                         | 2327                                              | 3156                                              | 0.688                                                     | 2.6832                                       | 36                         | 2144.5                                            | 4928.5                                            | 0.4195                                                    | 2.13945                                      |
| IG atpB-rbcL      | 100                  | 56115                          | 56880                        | 48                           | 2615                                              | 1773                                              | 2.3385                                       | 42                         | 778                                               | 1785.5                                            | 0.6525                                                    | 2.54475                                      | 48                         | 2557                                              | 3097.5                                            | 0.8675                                                    | 4.42425                                      |
| rbcL              | 101                  | 56671                          | 57124                        | 48                           | 3482.5                                            | 2299                                              | 0.7995                                       | 40                         | 1233.5                                            | 1977.5                                            | 0.5085                                                    | 1.98315                                      | 48                         | 3032.5                                            | 6586                                              | 0.4725                                                    | 2.40975                                      |
| rbcL 5'           | 102                  | 57038                          | 57606                        | 48                           | 5107.5                                            | 2904                                              | 2.888                                        | 42                         | 1233.5                                            | 6844                                              | 0.466                                                     | 1.8174                                       | 48                         | 4435                                              | 8167                                              | 0.6275                                                    | 3.20025                                      |

|               |                   |                             |                           | mature (long-day conditions) |                                          |                                          |                                        | greening                |                                          |                                          |                                                  |                                        | etiolated               |                                          |                                          |                                                  |                                        |
|---------------|-------------------|-----------------------------|---------------------------|------------------------------|------------------------------------------|------------------------------------------|----------------------------------------|-------------------------|------------------------------------------|------------------------------------------|--------------------------------------------------|----------------------------------------|-------------------------|------------------------------------------|------------------------------------------|--------------------------------------------------|----------------------------------------|
| probe name    | position on array | start of probe <sup>1</sup> | end of probe <sup>1</sup> | spot count <sup>2</sup>      | Median (F635 Median - B635) <sup>3</sup> | Median (F532 Median - B532) <sup>3</sup> | Membrane enrichment value <sup>4</sup> | spot count <sup>2</sup> | Median (F635 Median - B635) <sup>3</sup> | Median (F532 Median - B532) <sup>3</sup> | Median (Median of Ratios (635/532)) <sup>4</sup> | Membrane enrichment value <sup>4</sup> | spot count <sup>2</sup> | Median (F635 Median - B635) <sup>3</sup> | Median (F532 Median - B532) <sup>3</sup> | Median (Median of Ratios (635/532)) <sup>4</sup> | Membrane enrichment value <sup>4</sup> |
| rbcl 3'       | 103               | 57551                       | 58460                     | 48                           | 1410                                     | 835.5                                    | 2.3715                                 | 37                      | 810                                      | 1756                                     | 0.617                                            | 2.4063                                 | 46                      | 821                                      | 1627                                     | 0.686                                            | 3.4986                                 |
| IG-psal-1     | 104               | 58371                       | 59274                     | 24                           | 1368.5                                   | 1343.5                                   | 1.0275                                 | 30                      | 3029                                     | 634.5                                    | 1.1155                                           | 4.35045                                | 28                      | 841                                      | 2841                                     | 0.7245                                           | 3.69495                                |
| IG-psal-2     | 105               | 58496                       | 59506                     | 48                           | 4877                                     | 2000                                     | 4.375                                  | 42                      | 3535                                     | 3922.5                                   | 1.0315                                           | 4.02285                                | 47                      | 3395                                     | 6595                                     | 0.559                                            | 2.8509                                 |
| IG-psal-3     | 106               | 58496                       | 59506                     | 42                           | 4391                                     | 2593.5                                   | 3.0485                                 | 42                      | 3150.5                                   | 2923                                     | 1.1655                                           | 4.54545                                | 48                      | 4748.5                                   | 4256                                     | 0.976                                            | 4.9776                                 |
| psal          | 107               | 59151                       | 59301                     | 48                           | 4143.5                                   | 1116.5                                   | 5.427                                  | 42                      | 2320.5                                   | 2303.5                                   | 1.05                                             | 4.095                                  | 41                      | 3675                                     | 3898                                     | 0.78                                             | 3.978                                  |
| ycf4          | 108               | 59401                       | 60190                     | 48                           | 4324.5                                   | 1907.5                                   | 7.985                                  | 42                      | 4665.5                                   | 1900                                     | 1.094                                            | 4.2666                                 | 48                      | 3681                                     | 2957.5                                   | 1.1125                                           | 5.67375                                |
| ycf4-cemA     | 109               | 60011                       | 60660                     | 48                           | 2936                                     | 1284                                     | 11.2605                                | 35                      | 6956                                     | 1130                                     | 1.326                                            | 5.1714                                 | 48                      | 3632.5                                   | 1900.5                                   | 1.5145                                           | 7.72395                                |
| cemA          | 110               | 60470                       | 61484                     | 48                           | 10290.5                                  | 1859                                     | 6.4655                                 | 42                      | 6531                                     | 3989                                     | 1.5275                                           | 5.95725                                | 48                      | 5289                                     | 2955.5                                   | 1.439                                            | 7.3389                                 |
| cemA-petA     | 111               | 61221                       | 61560                     | 48                           | 7843.5                                   | 879                                      | 11.801                                 | 42                      | 3923                                     | 2846                                     | 1.767                                            | 6.8913                                 | 48                      | 5626                                     | 1025.5                                   | 1.716                                            | 8.7516                                 |
| petA          | 112               | 61469                       | 62333                     | 48                           | 4036.5                                   | 880                                      | 6.913                                  | 41                      | 2381                                     | 2209                                     | 1.197                                            | 4.6683                                 | 48                      | 2480.5                                   | 1516.5                                   | 1.0985                                           | 5.60235                                |
| petA 3'       | 113               | 62253                       | 63220                     | 47                           | 3496                                     | 3560                                     | 2.322                                  | 42                      | 1462                                     | 1308.5                                   | 1.036                                            | 4.0404                                 | 48                      | 2098                                     | 2437                                     | 0.677                                            | 3.4527                                 |
| psbJ          | 114               | 62880                       | 63520                     | 48                           | 2054                                     | 926                                      | 1.482                                  | 36                      | 2224.5                                   | 1139                                     | 0.8075                                           | 3.14925                                | 48                      | 1986.5                                   | 4254                                     | 0.5785                                           | 2.95035                                |
| psbJLFE       | 115               | 63220                       | 64125                     | 47                           | 5399                                     | 2625                                     | 4.404                                  | 42                      | 3494                                     | 6677                                     | 0.5845                                           | 2.27955                                | 48                      | 4796.5                                   | 9333                                     | 0.5335                                           | 2.72085                                |
| psbLFE        | 116               | 63541                       | 64320                     | 48                           | 3804                                     | 2175                                     | 3.3345                                 | 41                      | 2120                                     | 2966                                     | 0.764                                            | 2.9796                                 | 48                      | 3917                                     | 8168.5                                   | 0.6945                                           | 3.54195                                |
| IG psbE-petL  | 117               | 64026                       | 65280                     | 48                           | 2428.5                                   | 1605.5                                   | 2.04                                   | 42                      | 1599.5                                   | 3249                                     | 0.7255                                           | 2.82945                                | 47                      | 2289                                     | 6955                                     | 0.466                                            | 2.3766                                 |
| petL          | 118               | 65181                       | 65586                     | 37                           | 6524                                     | 2234                                     | 4.145                                  | 31                      | 8668                                     | 15791                                    | 0.69                                             | 2.691                                  | 37                      | 7148                                     | 29872                                    | 0.234                                            | 1.1934                                 |
| petG          | 119               | 65467                       | 65780                     | 48                           | 1727.5                                   | 3373                                     | 1.3605                                 | 42                      | 2501.5                                   | 10737                                    | 0.4335                                           | 1.69065                                | 48                      | 3906                                     | 7824                                     | 0.1975                                           | 1.00725                                |
| trnW-trnP     | 120               | 65732                       | 66399                     | 48                           | 1580                                     | 7769.5                                   | 0.659                                  | 42                      | 2850                                     | 15617.5                                  | 0.323                                            | 1.2597                                 | 48                      | 2075                                     | 15909                                    | 0.103                                            | 0.5253                                 |
| IG-psaJ-IG    | 121               | 66361                       | 67020                     | 48                           | 2843.5                                   | 3622.5                                   | 2.074                                  | 42                      | 1653                                     | 2775.5                                   | 0.5025                                           | 1.95975                                | 48                      | 3174.5                                   | 2735.5                                   | 0.3525                                           | 1.79775                                |
| psaJ          | 122               | 66399                       | 66673                     | 48                           | 709                                      | 503.5                                    | 1.925                                  | 28                      | 1239.5                                   | 1180                                     | 0.6465                                           | 2.52135                                | 37                      | 2335                                     | 19055                                    | 0.248                                            | 1.2648                                 |
| psaJ-rpl33    | 123               | 66551                       | 67121                     | 48                           | 1578.5                                   | 1465.5                                   | 2.3525                                 | 43                      | 775                                      | 1168                                     | 0.657                                            | 2.5623                                 | 48                      | 1862                                     | 2798.5                                   | 0.6825                                           | 3.48075                                |
| rpl33         | 124               | 66994                       | 67470                     | 45                           | 758                                      | 660                                      | 1.014                                  | 20                      | 4168.5                                   | 3840.5                                   |                                                  |                                        | 27                      | 623                                      | 2584                                     | 0.538                                            | 2.7438                                 |
| rps18         | 125               | 67281                       | 68186                     | 48                           | 2563                                     | 804.5                                    | 3.966                                  | 38                      | 586.5                                    | 2050                                     | 0.8535                                           | 3.32865                                | 38                      | 2346.5                                   | 4177.5                                   | 0.4215                                           | 2.14965                                |
| rpl20         | 126               | 68050                       | 68630                     | 48                           | 1086.5                                   | 887                                      | 3.4445                                 | 34                      | 1431.5                                   | 990.5                                    | 0.8905                                           | 3.47295                                | 40                      | 866.5                                    | 3221.5                                   | 0.6675                                           | 3.40425                                |
| rpl20-IG      | 127               | 68261                       | 68930                     | 48                           | 628                                      | 146.5                                    | 2.5685                                 | 24                      | 2809.5                                   | 3773.5                                   | 1.038                                            | 4.0482                                 | 33                      | 589                                      | 2146                                     | 0.9                                              | 4.59                                   |
| IG-rps12ex1   | 128               | 68793                       | 69460                     | 48                           | 1673                                     | 1086.5                                   | 2.715                                  | 39                      | 824                                      | 1038                                     | 0.84                                             | 3.276                                  | 46                      | 755.5                                    | 1032.5                                   | 0.611                                            | 3.1161                                 |
| rps12ex1-clpP | 129               | 69461                       | 70160                     | 48                           | 983.5                                    | 632                                      | 2.7485                                 | 26                      | 1830.5                                   | 639                                      | 0.938                                            | 3.6582                                 | 47                      | 778                                      | 2348                                     | 0.488                                            | 2.4888                                 |
| clpP-1        | 130               | 69544                       | 70394                     | 42                           | 543.5                                    | 844.5                                    | 0.7895                                 | 20                      | 9963.5                                   | 10491.5                                  |                                                  |                                        | 35                      | 1095                                     | 6450                                     | 0.339                                            | 1.7289                                 |

|                   |                      |                                |                              | mature (long-day conditions) |                                                   |                                                   |                                              | greening                   |                                                   |                                                   |                                                           |                                              | etiolated                  |                                                   |                                                   |                                                           |                                              |
|-------------------|----------------------|--------------------------------|------------------------------|------------------------------|---------------------------------------------------|---------------------------------------------------|----------------------------------------------|----------------------------|---------------------------------------------------|---------------------------------------------------|-----------------------------------------------------------|----------------------------------------------|----------------------------|---------------------------------------------------|---------------------------------------------------|-----------------------------------------------------------|----------------------------------------------|
| probe name        | position<br>on array | start of<br>probe <sup>1</sup> | end of<br>probe <sup>1</sup> | spot<br>count <sup>2</sup>   | Median<br>(F635<br>Median -<br>B635) <sup>3</sup> | Median<br>(F532<br>Median -<br>B532) <sup>3</sup> | Membrane<br>enrichment<br>value <sup>4</sup> | spot<br>count <sup>2</sup> | Median<br>(F635<br>Median -<br>B635) <sup>3</sup> | Median<br>(F532<br>Median -<br>B532) <sup>3</sup> | Median<br>(Median of<br>Ratios<br>(635/532)) <sup>4</sup> | Membrane<br>enrichment<br>value <sup>4</sup> | spot<br>count <sup>2</sup> | Median<br>(F635<br>Median -<br>B635) <sup>3</sup> | Median<br>(F532<br>Median -<br>B532) <sup>3</sup> | Median<br>(Median of<br>Ratios<br>(635/532)) <sup>4</sup> | Membrane<br>enrichment<br>value <sup>4</sup> |
| clpP-2            | 131                  | 69755                          | 69281                        | 48                           | 6077.5                                            | 1252                                              | 7.3205                                       | 42                         | 4770.5                                            | 1686                                              | 1.235                                                     | 4.8165                                       | 48                         | 3252                                              | 1678.5                                            | 1.228                                                     | 6.2628                                       |
| IG-psbB           | 132                  | 70265                          | 71133                        | 48                           | 6555.5                                            | 2036.5                                            | 6.486                                        | 42                         | 2827.5                                            | 1377                                              | 1.479                                                     | 5.7681                                       | 48                         | 3101.5                                            | 1446                                              | 1.5915                                                    | 8.11665                                      |
| psbB-1            | 133                  | 70762                          | 71780                        | 48                           | 14428                                             | 1892.5                                            | 7.585                                        | 42                         | 9660.5                                            | 5297                                              | 1.381                                                     | 5.3859                                       | 48                         | 6027                                              | 8603                                              | 1.582                                                     | 8.0682                                       |
| psbB-2            | 134                  | 71115                          | 71608                        | 48                           | 3220                                              | 591.5                                             | 4.64                                         | 42                         | 1480.5                                            | 1406.5                                            | 0.9995                                                    | 3.89805                                      | 48                         | 3409                                              | 10489.5                                           | 1.084                                                     | 5.5284                                       |
| psbBTN            | 135                  | 71603                          | 72640                        | 48                           | 7593                                              | 830.5                                             | 6.1975                                       | 42                         | 3815                                              | 2348.5                                            | 1.2835                                                    | 5.00565                                      | 48                         | 4004.5                                            | 6081                                              | 1.049                                                     | 5.3499                                       |
| psbBTNH           | 136                  | 71953                          | 72823                        | 47                           | 4503                                              | 3159                                              | 2.91                                         | 42                         | 2152.5                                            | 1301.5                                            | 1.352                                                     | 5.2728                                       | 48                         | 3396                                              | 2881.5                                            | 1.0295                                                    | 5.25045                                      |
| psbH              | 137                  | 72695                          | 73150                        | 48                           | 2488.5                                            | 1016                                              | 1.53                                         | 42                         | 2598                                              | 1879.5                                            | 1.069                                                     | 4.1691                                       | 48                         | 2521                                              | 3145.5                                            | 0.78                                                      | 3.978                                        |
| psbH-petBex1      | 138                  | 72710                          | 73314                        | 48                           | 9019.5                                            | 2180.5                                            | 10.309                                       | 42                         | 6980.5                                            | 1305.5                                            | 2.3905                                                    | 9.32295                                      | 48                         | 4844                                              | 2911.5                                            | 1.51                                                      | 7.701                                        |
|                   |                      | 72929                          | 73848                        |                              |                                                   |                                                   |                                              |                            |                                                   |                                                   |                                                           |                                              |                            |                                                   |                                                   |                                                           |                                              |
| psbH-petBex2-in   | 139                  |                                |                              | 12                           | 2501                                              | 2803.5                                            |                                              | 12                         | 863                                               | 600                                               |                                                           |                                              | 12                         | 952.5                                             | 478                                               |                                                           |                                              |
| petBfull          | 140                  | 73085                          | 74566                        | 48                           | 5653.5                                            | 1835                                              | 5.7885                                       | 42                         | 4501                                              | 2429                                              | 1.0555                                                    | 4.11645                                      | 48                         | 2780.5                                            | 3409.5                                            | 0.697                                                     | 3.5547                                       |
| petBex1-in        | 141                  | 73061                          | 73490                        | 48                           | 5374.5                                            | 2052                                              | 7.888                                        | 41                         | 5947                                              | 1803                                              | 1.847                                                     | 7.2033                                       | 48                         | 4511                                              | 3710.5                                            | 1.459                                                     | 7.4409                                       |
| petBin            |                      | 74800                          | 75400                        | 48                           | 2972                                              | 841                                               | 5.506                                        | 42                         | 1454                                              | 1813                                              | 0.8755                                                    | 3.41445                                      | 48                         | 2982.5                                            | 2380.5                                            | 0.659                                                     | 3.3609                                       |
|                   |                      |                                |                              |                              |                                                   |                                                   |                                              |                            |                                                   |                                                   |                                                           |                                              |                            |                                                   |                                                   |                                                           |                                              |
| petBex1-in-ex2    | 142                  | 73120                          | 73990                        | 48                           | 5631.5                                            | 1677                                              | 6.6345                                       | 42                         | 7211.5                                            | 3139                                              | 1.0755                                                    | 4.19445                                      | 48                         | 4932                                              | 5483.5                                            | 0.9015                                                    | 4.59765                                      |
| petBex2           | 143                  | 73749                          | 74607                        | 12                           | 2976                                              | 4948.5                                            |                                              | 12                         | 1331                                              | 1350                                              |                                                           |                                              | 12                         | 2243.5                                            | 1257.5                                            |                                                           |                                              |
| petBex2-petDex1-1 | 144                  | 74382                          | 74818                        | 5                            | 496                                               | 266                                               |                                              | 42                         | 6504                                              | 2847.5                                            | 0.8815                                                    | 3.43785                                      | 2                          | 274.5                                             | 2432.5                                            |                                                           |                                              |
| petBex2-petDex1-2 | 145                  | 74421                          | 74755                        | 48                           | 4676.5                                            | 3409.5                                            | 3.9395                                       | 42                         | 4490.5                                            | 4610.5                                            | 0.926                                                     | 3.6114                                       | 48                         | 6387.5                                            | 8051                                              | 0.504                                                     | 2.5704                                       |
| petDex2-rpoA-1    | 146                  | 74777                          | 75895                        | 48                           | 3293                                              | 1156                                              | 4.4095                                       | 38                         | 1780.5                                            | 1144.5                                            | 1.134                                                     | 4.4226                                       | 48                         | 2030.5                                            | 3399.5                                            | 0.6715                                                    | 3.42465                                      |
| petDex2-rpoA-2    | 147                  | 75539                          | 76501                        | 48                           | 2048                                              | 974.5                                             | 4.3645                                       | 28                         | 2394.5                                            | 542.5                                             | 1.272                                                     | 4.9608                                       | 48                         | 1214.5                                            | 1479.5                                            | 1.023                                                     | 5.2173                                       |
| rpoA 3'           | 148                  | 75991                          | 76790                        | 48                           | 1135.5                                            | 525.5                                             | 4.681                                        | 45                         | 1000                                              | 2160                                              | 0.999                                                     | 3.8961                                       | 45                         | 981                                               | 2056                                              | 1.065                                                     | 5.4315                                       |
| rpoA              | 149                  | 76388                          | 77170                        | 48                           | 2058                                              | 1042.5                                            | 2.366                                        | 22                         | 5638.5                                            | 6358.5                                            |                                                           |                                              | 48                         | 1641.5                                            | 3754                                              | 0.4785                                                    | 2.44035                                      |
| rpoA-rps11        | 150                  | 76837                          | 77490                        | 48                           | 1133                                              | 371.5                                             | 3.9225                                       | 40                         | 648.5                                             | 1663                                              | 0.807                                                     | 3.1473                                       | 38                         | 893.5                                             | 2815.5                                            | 0.869                                                     | 4.4319                                       |
| rps11-rpl36       | 151                  | 77275                          | 77945                        | 48                           | 1107                                              | 566.5                                             | 1.9685                                       | 23                         | 5108                                              | 3689                                              |                                                           |                                              | 41                         | 1104                                              | 4532                                              | 0.47                                                      | 2.397                                        |
|                   |                      |                                |                              |                              |                                                   |                                                   |                                              |                            |                                                   |                                                   |                                                           |                                              |                            |                                                   |                                                   |                                                           |                                              |
| rpl36-infA-rps8   | 152                  | 77790                          | 78898                        | 48                           | 1645.5                                            | 139.5                                             | 4.803                                        | 17                         | 6562                                              | 6254                                              |                                                           |                                              | 45                         | 1226                                              | 2751                                              | 0.846                                                     | 4.3146                                       |
| infA              | 153                  | 78001                          | 78460                        | 32                           | 762.5                                             | 714.5                                             | 1.0125                                       | 19                         | 6106                                              | 5089                                              |                                                           |                                              | 29                         | 349                                               | 1207                                              | 0.405                                                     | 2.0655                                       |

|                     |                   |                             |                           | mature (long-day conditions) |                                          |                                          |                                        | greening                |                                          |                                          |                                                  |                                        | etiolated               |                                          |                                          |                                                  |                                        |
|---------------------|-------------------|-----------------------------|---------------------------|------------------------------|------------------------------------------|------------------------------------------|----------------------------------------|-------------------------|------------------------------------------|------------------------------------------|--------------------------------------------------|----------------------------------------|-------------------------|------------------------------------------|------------------------------------------|--------------------------------------------------|----------------------------------------|
| probe name          | position on array | start of probe <sup>1</sup> | end of probe <sup>1</sup> | spot count <sup>2</sup>      | Median (F635 Median - B635) <sup>3</sup> | Median (F532 Median - B532) <sup>3</sup> | Membrane enrichment value <sup>4</sup> | spot count <sup>2</sup> | Median (F635 Median - B635) <sup>3</sup> | Median (F532 Median - B532) <sup>3</sup> | Median (Median of Ratios (635/532)) <sup>4</sup> | Membrane enrichment value <sup>4</sup> | spot count <sup>2</sup> | Median (F635 Median - B635) <sup>3</sup> | Median (F532 Median - B532) <sup>3</sup> | Median (Median of Ratios (635/532)) <sup>4</sup> | Membrane enrichment value <sup>4</sup> |
| rps8                | 154               | 78400                       | 79003                     | 47                           | 660                                      | 419                                      | 1.366                                  | 22                      | 4551                                     | 6367                                     |                                                  |                                        | 39                      | 523                                      | 2288                                     | 0.59                                             | 3.009                                  |
| rps8-rpl14-rpl16ex2 | 155               | 78797                       | 79860                     | 48                           | 1879                                     | 474                                      | 1.469                                  | 20                      | 9829                                     | 9902.5                                   |                                                  |                                        | 39                      | 1468                                     | 3264                                     | 0.518                                            | 2.6418                                 |
| rpl14               | 156               | 78959                       | 79481                     | 46                           | 1113                                     | 132.5                                    | 4.194                                  | 13                      | 803                                      | 1289                                     |                                                  |                                        | 34                      | 1037                                     | 5447.5                                   | 0.4045                                           | 2.06295                                |
| rpl16in-ex1         | 157               | 79663                       | 80168                     | 33                           | 660                                      | 547                                      | 0.966                                  | 28                      | 1956.5                                   | 801                                      | 0.724                                            | 2.8236                                 | 23                      | 124                                      | 420                                      |                                                  |                                        |
| rpl16in             | 158               | 80002                       | 81109                     | 48                           | 1341                                     | 524                                      | 3.161                                  | 34                      | 1049.5                                   | 1963.5                                   | 0.6905                                           | 2.69295                                | 45                      | 1197                                     | 3797                                     | 0.801                                            | 4.0851                                 |
| rpl16ex2-in         | 159               | 80002                       | 80888                     | 48                           | 1092                                     | 331.5                                    | 3.1525                                 | 24                      | 2412                                     | 3429                                     | 0.846                                            | 3.2994                                 | 43                      | 1129                                     | 5263                                     | 0.594                                            | 3.0294                                 |
| rps3                | 160               | 81003                       | 81840                     | 48                           | 603.5                                    | 583.5                                    | 2.0275                                 | 23                      | 5423                                     | 5519                                     |                                                  |                                        | 32                      | 638.5                                    | 2908                                     | 0.611                                            | 3.1161                                 |
| rps19               | 161               | 82360                       | 82720                     | 48                           | 844                                      | 124.5                                    | 2.6605                                 | 42                      | 5669.5                                   | 16134                                    | 0.455                                            | 1.7745                                 | 47                      | 821                                      | 2635                                     | 0.709                                            | 3.6159                                 |
| rpl22               | 162               | 82459                       | 81709                     | 48                           | 3425.5                                   | 8191                                     | 0.6455                                 | 42                      | 12355                                    | 52122                                    | 0.293                                            | 1.1427                                 | 48                      | 3666                                     | 24082.5                                  | 0.125                                            | 0.6375                                 |
| trnH                | 163               | 82721                       | 82881                     | 48                           | 6729.5                                   | 13550                                    | 0.6945                                 | 42                      | 1385.5                                   | 1663                                     | 0.717                                            | 2.7963                                 | 48                      | 3833.5                                   | 30808.5                                  | 0.156                                            | 0.7956                                 |
| rpl2ex2             | 164               | 82901                       | 83518                     | 48                           | 2255                                     | 1460.5                                   | 2.3405                                 | 26                      | 1049.5                                   | 655                                      | 0.8185                                           | 3.19215                                | 48                      | 2167.5                                   | 2397                                     | 0.5165                                           | 2.63415                                |
| rpl2in              | 165               | 83356                       | 84000                     | 45                           | 720                                      | 1605                                     | 0.698                                  | 40                      | 865                                      | 1969                                     | 0.6885                                           | 2.68515                                | 41                      | 642                                      | 3984                                     | 0.373                                            | 1.9023                                 |
| rpl2in-ex1          | 166               | 83410                       | 84363                     | 47                           | 1176                                     | 1448                                     | 1.012                                  | 23                      | 1168                                     | 1078                                     |                                                  |                                        | 48                      | 2064.5                                   | 4233                                     | 0.396                                            | 2.0196                                 |
| rpl2ex1-rpl23       | 167               | 84263                       | 84560                     | 42                           | 569                                      | 1218                                     | 0.467                                  | 26                      | 1403                                     | 812.5                                    | 0.874                                            | 3.4086                                 | 34                      | 506.5                                    | 2466.5                                   | 0.444                                            | 2.2644                                 |
| rpl23               | 168               | 84411                       | 84750                     | 47                           | 966                                      | 2158                                     | 0.7                                    | 28                      | 954                                      | 1058.5                                   | 0.8715                                           | 3.39885                                | 42                      | 857.5                                    | 4108                                     | 0.4895                                           | 2.49645                                |
| IG rpl23-trnI-CAU   | 169               | 84667                       | 84890                     | 43                           | 731                                      | 1424                                     | 0.384                                  | 42                      | 445                                      | 6610                                     | 0.1045                                           | 0.40755                                | 35                      | 475                                      | 1786                                     | 0.371                                            | 1.8921                                 |
| trnI-CAU            | 170               | 84852                       | 84980                     | 39                           | 603                                      | 9902                                     | 0.383                                  | 22                      | 2103.5                                   | 4753                                     |                                                  |                                        | 48                      | 524                                      | 4571                                     | 0.116                                            | 0.5916                                 |
| ORF46-34-241        | 171               | 84955                       | 85536                     | 27                           | 365                                      | 1588                                     | 0.21                                   | 21                      | 3449                                     | 7890                                     |                                                  |                                        | 28                      | 136                                      | 1402                                     | 0.355                                            | 1.8105                                 |
| ORF241              | 172               | 85408                       | 86280                     | 24                           | 340.5                                    | 2296                                     | 0.203                                  | 22                      | 1421.5                                   | 2778                                     |                                                  |                                        | 29                      | 275                                      | 2408                                     | 0.336                                            | 1.7136                                 |
| ORF139              | 173               | 86161                       | 86633                     | 23                           | 511                                      | 2009                                     |                                        | 20                      | 1876.5                                   | 4730.5                                   |                                                  |                                        | 30                      | 273                                      | 1385                                     | 0.355                                            | 1.8105                                 |
| ORF38-99            | 174               | 86534                       | 87698                     | 29                           | 280                                      | 1298                                     | 0.277                                  | 23                      | 1302                                     | 4066                                     |                                                  |                                        | 29                      | 319                                      | 1194                                     | 0.443                                            | 2.2593                                 |
| ORF99               | 175               | 86911                       | 87870                     | 25                           | 304                                      | 1418                                     | 0.256                                  | 25                      | 851                                      | 898                                      | 0.616                                            | 2.4024                                 | 30                      | 453                                      | 1081.5                                   | 0.426                                            | 2.1726                                 |
| ORF99-137           | 176               | 87599                       | 88430                     | 30                           | 405.5                                    | 2107.5                                   | 0.2025                                 | 12                      | 1240.5                                   | 2040                                     |                                                  |                                        | 39                      | 357                                      | 1485                                     | 0.393                                            | 2.0043                                 |
| IG ORF137-trnL-GAC  | 177               | 88381                       | 88570                     | 21                           | 114                                      | 1440                                     |                                        | 41                      | 528                                      | 9336                                     | 0.095                                            | 0.3705                                 | 15                      | 46                                       | 509                                      |                                                  |                                        |
| trnL-GAC            | 178               | 88568                       | 88674                     | 48                           | 287                                      | 3674.5                                   | 0.169                                  | 36                      | 2094.5                                   | 1027.5                                   | 0.829                                            | 3.2331                                 | 48                      | 877.5                                    | 7987.5                                   | 0.0845                                           | 0.43095                                |
| IG-ndhBex2          | 179               | 88661                       | 89658                     | 48                           | 2263                                     | 1284.5                                   | 4.4065                                 | 39                      | 1387                                     | 1260                                     | 0.841                                            | 3.2799                                 | 48                      | 1174                                     | 3093                                     | 0.679                                            | 3.4629                                 |

|                               |                   |                             |                           | mature (long-day conditions) |                                          |                                          |                                        | greening                |                                          |                                          |                                                  |                                        | etiolated               |                                          |                                          |                                                  |                                        |
|-------------------------------|-------------------|-----------------------------|---------------------------|------------------------------|------------------------------------------|------------------------------------------|----------------------------------------|-------------------------|------------------------------------------|------------------------------------------|--------------------------------------------------|----------------------------------------|-------------------------|------------------------------------------|------------------------------------------|--------------------------------------------------|----------------------------------------|
| probe name                    | position on array | start of probe <sup>1</sup> | end of probe <sup>1</sup> | spot count <sup>2</sup>      | Median (F635 Median - B635) <sup>3</sup> | Median (F532 Median - B532) <sup>3</sup> | Membrane enrichment value <sup>4</sup> | spot count <sup>2</sup> | Median (F635 Median - B635) <sup>3</sup> | Median (F532 Median - B532) <sup>3</sup> | Median (Median of Ratios (635/532)) <sup>4</sup> | Membrane enrichment value <sup>4</sup> | spot count <sup>2</sup> | Median (F635 Median - B635) <sup>3</sup> | Median (F532 Median - B532) <sup>3</sup> | Median (Median of Ratios (635/532)) <sup>4</sup> | Membrane enrichment value <sup>4</sup> |
| ndhBex2                       | 180               | 89201                       | 90020                     | 48                           | 2377.5                                   | 1191                                     | 5.335                                  | 21                      | 2907                                     | 4779                                     |                                                  |                                        | 48                      | 2312.5                                   | 4752                                     | 0.5675                                           | 2.89425                                |
| ndhBin-2                      | 181               | 89552                       | 90145                     | 47                           | 577                                      | 828                                      | 0.756                                  | 33                      | 1841                                     | 3040                                     | 0.754                                            | 2.9406                                 | 40                      | 419.5                                    | 1808                                     | 0.5525                                           | 2.81775                                |
| ndhBex2-in                    | 182               | 89930                       | 90720                     | 37                           | 2753                                     | 395                                      | 7.162                                  | 40                      | 836.5                                    | 2016.5                                   | 0.6235                                           | 2.43165                                | 37                      | 2335                                     | 10966                                    | 0.342                                            | 1.7442                                 |
| ndhBin-1                      | 183               | 90044                       | 90718                     | 48                           | 915.5                                    | 851                                      | 2.3795                                 | 42                      | 3687                                     | 1435.5                                   | 1.0555                                           | 4.11645                                | 45                      | 938                                      | 3470                                     | 0.594                                            | 3.0294                                 |
| ndhBex1                       | 184               | 90618                       | 91590                     | 48                           | 2641.5                                   | 1710                                     | 7.4135                                 | 41                      | 540                                      | 1705                                     | 0.713                                            | 2.7807                                 | 48                      | 2409                                     | 4795.5                                   | 0.633                                            | 3.2283                                 |
| ndhB-rps7                     | 185               | 91441                       | 91820                     | 48                           | 1441                                     | 1038.5                                   | 4.3945                                 | 38                      | 657                                      | 1303.5                                   | 0.6815                                           | 2.65785                                | 48                      | 1514.5                                   | 2816                                     | 0.5595                                           | 2.85345                                |
| rps7                          | 186               | 91735                       | 92225                     | 48                           | 921.5                                    | 677.5                                    | 3.9465                                 | 44                      | 917                                      | 2038.5                                   | 0.8145                                           | 3.17655                                | 45                      | 1532                                     | 8354                                     | 0.436                                            | 2.2236                                 |
| rps7-rps12ex3-in2             | 187               | 92164                       | 92690                     | 48                           | 2688                                     | 1686                                     | 6.587                                  | 42                      | 1066                                     | 2276.5                                   | 0.7475                                           | 2.91525                                | 48                      | 2904.5                                   | 6125                                     | 0.661                                            | 3.3711                                 |
| rps12ex3-in-ex2               | 188               | 92226                       | 93201                     | 48                           | 2287                                     | 1379.5                                   | 2.3955                                 | 37                      | 969                                      | 2032                                     | 0.698                                            | 2.7222                                 | 48                      | 2001.5                                   | 4241                                     | 0.581                                            | 2.9631                                 |
| rps12ex3-in                   | 189               | 92281                       | 92860                     | 48                           | 2092                                     | 1217.5                                   | 3.772                                  | 24                      | 4806                                     | 4735                                     | 0.9635                                           | 3.75765                                | 44                      | 1477                                     | 4852                                     | 0.5055                                           | 2.57805                                |
| rps12ex2-in1                  | 190               | 92876                       | 93570                     | 48                           | 1477                                     | 648                                      | 3.214                                  | 42                      | 739.5                                    | 1491                                     | 0.7385                                           | 2.88015                                | 42                      | 956                                      | 5454.5                                   | 0.388                                            | 1.9788                                 |
| lGrps12-ORF58-1               | 191               | 93161                       | 94190                     | 48                           | 2540.5                                   | 1378                                     | 2.628                                  | 19                      | 1916                                     | 3227                                     |                                                  |                                        | 48                      | 2251.5                                   | 3037.5                                   | 0.5735                                           | 2.92485                                |
| lGrps12-ORF58-2               | 192               | 94041                       | 94285                     | 24                           | 280.5                                    | 978                                      | 0.3335                                 | 22                      | 6515.5                                   | 11575                                    |                                                  |                                        | 26                      | 189                                      | 1305                                     | 0.396                                            | 2.0196                                 |
| ORF58                         | 193               | 94236                       | 94790                     | 27                           | 838                                      | 1968                                     | 0.288                                  | 41                      | 626                                      | 8842                                     | 0.195                                            | 0.7605                                 | 28                      | 586.5                                    | 1256                                     | 0.1755                                           | 0.89505                                |
| trnV-GAC-2                    | 194               | 94751                       | 94946                     | 40                           | 741.5                                    | 18436.5                                  | 0.287                                  | 41                      | 41993                                    | 55410                                    | 0.948                                            | 3.6972                                 | 48                      | 1122                                     | 8133                                     | 0.088                                            | 0.4488                                 |
| trnV-GAC-16S                  | 195               | 94931                       | 95656                     | 48                           | 44260                                    | 24047                                    | 1.0065                                 | 45                      | 7880                                     | 17905                                    | 0.597                                            | 2.3283                                 | 48                      | 24691.5                                  | 57426.5                                  | 0.6195                                           | 3.15945                                |
| 16S-1                         | 196               | 95560                       | 96780                     | 48                           | 11150.5                                  | 6593                                     | 2.4445                                 | 42                      | 7429                                     | 12939.5                                  | 0.5935                                           | 2.31465                                | 48                      | 8899                                     | 13625.5                                  | 0.447                                            | 2.2797                                 |
| 16S-2                         | 197               | 96441                       | 96950                     | 48                           | 11109.5                                  | 4993                                     | 2.2355                                 | 42                      | 7176                                     | 7914.5                                   | 0.523                                            | 2.0397                                 | 48                      | 6697                                     | 9355                                     | 0.519                                            | 2.6469                                 |
| 16S-3                         | 198               | 96683                       | 97930                     | 48                           | 10543.5                                  | 9257                                     | 3.187                                  | 42                      | 1183                                     | 2525                                     | 0.419                                            | 1.6341                                 | 48                      | 5341.5                                   | 9632                                     | 0.342                                            | 1.7442                                 |
| 16S-trnI-GAUex1-in            | 199               | 96953                       | 97540                     | 48                           | 3168                                     | 1298.5                                   | 3.0815                                 | 42                      | 3247.5                                   | 6903.5                                   | 0.4675                                           | 1.82325                                | 48                      | 1769                                     | 5849                                     | 0.3165                                           | 1.61415                                |
| trnI-GAUex1-in                | 200               | 96956                       | 97973                     | 48                           | 3650.5                                   | 6656.5                                   | 2.4645                                 | 42                      | 6282.5                                   | 6035.5                                   | 0.531                                            | 2.0709                                 | 48                      | 3768.5                                   | 11238                                    | 0.21                                             | 1.071                                  |
| trnI-GAU full                 | 201               | 96991                       | 97930                     | 48                           | 10573                                    | 10852                                    | 3.7875                                 | 42                      | 4716                                     | 6790                                     | 0.454                                            | 1.7706                                 | 48                      | 5710.5                                   | 12558.5                                  | 0.321                                            | 1.6371                                 |
| trnI-GAUin-ex2-trnA-UGCex1-in | 202               | 97814                       | 98644                     | 48                           | 6296                                     | 8801                                     | 2.7965                                 | 45                      | 2164                                     | 5459                                     | 0.407                                            | 1.5873                                 | 48                      | 5201.5                                   | 11396                                    | 0.251                                            | 1.2801                                 |



|                        |                      |                                |                              | mature (long-day conditions) |                                                   |                                                   |                                              | greening                   |                                                   |                                                   |                                                           |                                              | etiolated                  |                                                   |                                                   |                                                           |                                              |
|------------------------|----------------------|--------------------------------|------------------------------|------------------------------|---------------------------------------------------|---------------------------------------------------|----------------------------------------------|----------------------------|---------------------------------------------------|---------------------------------------------------|-----------------------------------------------------------|----------------------------------------------|----------------------------|---------------------------------------------------|---------------------------------------------------|-----------------------------------------------------------|----------------------------------------------|
| probe name             | position<br>on array | start of<br>probe <sup>1</sup> | end of<br>probe <sup>1</sup> | spot<br>count <sup>2</sup>   | Median<br>(F635<br>Median -<br>B635) <sup>3</sup> | Median<br>(F532<br>Median -<br>B532) <sup>3</sup> | Membrane<br>enrichment<br>value <sup>4</sup> | spot<br>count <sup>2</sup> | Median<br>(F635<br>Median -<br>B635) <sup>3</sup> | Median<br>(F532<br>Median -<br>B532) <sup>3</sup> | Median<br>(Median of<br>Ratios<br>(635/532)) <sup>4</sup> | Membrane<br>enrichment<br>value <sup>4</sup> | spot<br>count <sup>2</sup> | Median<br>(F635<br>Median -<br>B635) <sup>3</sup> | Median<br>(F532<br>Median -<br>B532) <sup>3</sup> | Median<br>(Median of<br>Ratios<br>(635/532)) <sup>4</sup> | Membrane<br>enrichment<br>value <sup>4</sup> |
| trnA-UGC full          | 203                  | 98038                          | 98915                        | 48                           | 3994                                              | 5179.5                                            | 2.4705                                       | 42                         | 1543.5                                            | 2613.5                                            | 0.5345                                                    | 2.08455                                      | 48                         | 3391.5                                            | 11603                                             | 0.2155                                                    | 1.09905                                      |
| trnA-UGC in            | 204                  | 98079                          | 98644                        | 48                           | 3120.5                                            | 1524                                              | 3.1025                                       | 42                         | 7673                                              | 12924.5                                           | 0.5045                                                    | 1.96755                                      | 48                         | 2617.5                                            | 4746                                              | 0.4495                                                    | 2.29245                                      |
| trnA-UGCin-ex2         | 205                  | 98333                          | 99792                        | 48                           | 14261.5                                           | 4680                                              | 3.072                                        | 42                         | 26366.5                                           | 57281                                             | 1.0585                                                    | 4.12815                                      | 48                         | 4384.5                                            | 6928                                              | 0.431                                                     | 2.1981                                       |
| trnA-UGCin-ex2-<br>23S | 206                  | 98711                          | 99060                        | 48                           | 25277                                             | 19058.5                                           | 3.26                                         | 42                         | 43651                                             | 57845                                             | 1.06                                                      | 4.134                                        | 48                         | 22098.5                                           | 21428.5                                           | 1.088                                                     | 5.5488                                       |
| 23S-1                  | 207                  | 99067                          | 100618                       | 48                           | 61880                                             | 11452.5                                           | 2.377                                        | 42                         | 37098                                             | 28337                                             | 1.059                                                     | 4.1301                                       | 48                         | 45391                                             | 38673.5                                           | 0.9895                                                    | 5.04645                                      |
| 23S-2                  | 208                  | 100098                         | 101639                       | 48                           | 48085                                             | 16484                                             | 2.3545                                       | 42                         | 31345                                             | 21195                                             | 1.061                                                     | 4.1379                                       | 48                         | 32412.5                                           | 40812                                             | 1.066                                                     | 5.4366                                       |
| 23S-3                  | 209                  | 101126                         | 102060                       | 48                           | 47356                                             | 16972.5                                           | 0.987                                        | 42                         | 3547.5                                            | 1933.5                                            | 1.626                                                     | 6.3414                                       | 48                         | 28594                                             | 40078.5                                           | 1.221                                                     | 6.2271                                       |
| 4.5S                   | 210                  | 101951                         | 102270                       | 48                           | 5357                                              | 2065.5                                            | 2.8415                                       | 42                         | 25701                                             | 9125                                              | 1.865                                                     | 7.2735                                       | 48                         | 4177                                              | 5464                                              | 1.2215                                                    | 6.22965                                      |
| 5S                     | 211                  | 102161                         | 102619                       | 48                           | 18351.5                                           | 6669                                              | 2.696                                        | 42                         | 18281.5                                           | 8649.5                                            | 2.3375                                                    | 9.11625                                      | 48                         | 10602.5                                           | 23824                                             | 0.8525                                                    | 4.34775                                      |
| 5S-IG                  | 212                  | 102363                         | 102740                       | 48                           | 15934.5                                           | 9114.5                                            | 2.644                                        | 38                         | 681.5                                             | 1212                                              | 0.481                                                     | 1.8759                                       | 48                         | 10034.5                                           | 17763                                             | 0.883                                                     | 4.5033                                       |
| trnR-ACG               | 214                  | 102631                         | 103061                       | 48                           | 487.5                                             | 834.5                                             | 0.664                                        | 42                         | 10625.5                                           | 38955                                             | 0.338                                                     | 1.3182                                       | 48                         | 740                                               | 4297                                              | 0.1755                                                    | 0.89505                                      |
| trnN-GUU               | 215                  | 102941                         | 103450                       | 48                           | 5949                                              | 12893                                             | 0.77                                         | 35                         | 1105                                              | 2003                                              | 0.589                                                     | 2.2971                                       | 48                         | 10807.5                                           | 19420.5                                           | 0.1925                                                    | 0.98175                                      |
| IG-ORF63               | 216                  | 103203                         | 104382                       | 37                           | 2173                                              | 559                                               | 5.101                                        | 33                         | 4529                                              | 1003                                              | 1.077                                                     | 4.2003                                       | 36                         | 1232.5                                            | 4198.5                                            | 0.4805                                                    | 2.45055                                      |
| ORF63-IG               | 217                  | 104004                         | 104750                       | 48                           | 1158                                              | 972.5                                             | 4.8195                                       | 42                         | 932                                               | 1494                                              | 0.921                                                     | 3.5919                                       | 44                         | 1477                                              | 3117.5                                            | 0.6235                                                    | 3.17985                                      |
| rps15                  | 218                  | 104382                         | 105057                       | 48                           | 1486.5                                            | 1095                                              | 3.059                                        | 30                         | 2419.5                                            | 765                                               | 1.2435                                                    | 4.84965                                      | 47                         | 1342                                              | 3405                                              | 0.586                                                     | 2.9886                                       |
| rps15-ndhF             | 219                  | 104954                         | 105217                       | 48                           | 1604                                              | 474.5                                             | 2.2                                          | 29                         | 3898                                              | 1532                                              | 1.283                                                     | 5.0037                                       | 48                         | 1034.5                                            | 909                                               | 0.763                                                     | 3.8913                                       |
| ndhF 3'                | 220                  | 105071                         | 106310                       | 48                           | 917.5                                             | 240.5                                             | 5.5265                                       | 45                         | 774                                               | 900                                               | 1.039                                                     | 4.0521                                       | 42                         | 841                                               | 1475.5                                            | 1.0135                                                    | 5.16885                                      |
| ndhF 5'                | 221                  | 106209                         | 107659                       | 48                           | 2303                                              | 1174                                              | 6.246                                        | 42                         | 1475                                              | 3330                                              | 0.4745                                                    | 1.85055                                      | 46                         | 1496                                              | 3339.5                                            | 0.813                                                     | 4.1463                                       |
| ndhF-rpl32             | 222                  | 107161                         | 108424                       | 48                           | 2852                                              | 1554                                              | 4.4445                                       | 34                         | 1600                                              | 837.5                                             | 1.639                                                     | 6.3921                                       | 48                         | 2388.5                                            | 2093.5                                            | 0.6135                                                    | 3.12885                                      |
| rpl32                  | 223                  | 107961                         | 108800                       | 48                           | 761                                               | 560.5                                             | 2.9985                                       | 42                         | 7478                                              | 46191.5                                           | 0.221                                                     | 0.8619                                       | 38                         | 525                                               | 1395.5                                            | 1.022                                                     | 5.2122                                       |
| trnL-UAG               | 224                  | 108641                         | 108930                       | 48                           | 2389.5                                            | 31310.5                                           | 0.284                                        | 38                         | 1648.5                                            | 1236                                              | 1.1425                                                    | 4.45575                                      | 48                         | 5537                                              | 33536                                             | 0.113                                                     | 0.5763                                       |
| ccsA                   | 225                  | 108881                         | 110021                       | 48                           | 1254                                              | 1247                                              | 3.23                                         | 42                         | 4850.5                                            | 1984                                              | 1.694                                                     | 6.6066                                       | 48                         | 925.5                                             | 1444                                              | 0.5415                                                    | 2.76165                                      |
| ccsA 3'                | 226                  | 109421                         | 110130                       | 48                           | 2357.5                                            | 1088                                              | 3.1725                                       | 28                         | 3646.5                                            | 1004                                              | 1.4275                                                    | 5.56725                                      | 47                         | 1002                                              | 1214                                              | 0.782                                                     | 3.9882                                       |
| ndhD 3'                | 227                  | 110021                         | 110615                       | 48                           | 3242                                              | 1030.5                                            | 4.9255                                       | 21                         | 4169                                              | 4385                                              |                                                           |                                              | 45                         | 1881                                              | 2893                                              | 0.828                                                     | 4.2228                                       |
| ndhD                   | 228                  | 110495                         | 111610                       | 48                           | 1236.5                                            | 622                                               | 3.3                                          | 44                         | 3053                                              | 1260                                              | 1.162                                                     | 4.5318                                       | 35                         | 685                                               | 1181                                              | 0.809                                                     | 4.1259                                       |
| ndhD 5'                | 229                  | 110661                         | 111740                       | 48                           | 3294.5                                            | 1580.5                                            | 5.661                                        | 42                         | 1634                                              | 3159                                              | 0.7545                                                    | 2.94255                                      | 48                         | 1580.5                                            | 2268                                              | 1.0035                                                    | 5.11785                                      |
| ndhD-psaC              | 230                  | 111509                         | 112226                       | 48                           | 3880.5                                            | 2946.5                                            | 2.5035                                       | 42                         | 8503.5                                            | 10381.5                                           | 0.503                                                     | 1.9617                                       | 48                         | 3412                                              | 7589.5                                            | 0.5065                                                    | 2.58315                                      |

|              |                   |                             |                           | mature (long-day conditions) |                                          |                                          |                                        | greening                |                                          |                                          |                                                  |                                        | etiolated               |                                          |                                          |                                                  |                                        |
|--------------|-------------------|-----------------------------|---------------------------|------------------------------|------------------------------------------|------------------------------------------|----------------------------------------|-------------------------|------------------------------------------|------------------------------------------|--------------------------------------------------|----------------------------------------|-------------------------|------------------------------------------|------------------------------------------|--------------------------------------------------|----------------------------------------|
| probe name   | position on array | start of probe <sup>1</sup> | end of probe <sup>1</sup> | spot count <sup>2</sup>      | Median (F635 Median - B635) <sup>3</sup> | Median (F532 Median - B532) <sup>3</sup> | Membrane enrichment value <sup>4</sup> | spot count <sup>2</sup> | Median (F635 Median - B635) <sup>3</sup> | Median (F532 Median - B532) <sup>3</sup> | Median (Median of Ratios (635/532)) <sup>4</sup> | Membrane enrichment value <sup>4</sup> | spot count <sup>2</sup> | Median (F635 Median - B635) <sup>3</sup> | Median (F532 Median - B532) <sup>3</sup> | Median (Median of Ratios (635/532)) <sup>4</sup> | Membrane enrichment value <sup>4</sup> |
| psaC         | 231               | 111760                      | 112020                    | 48                           | 4163                                     | 3017                                     | 3.5275                                 | 34                      | 6677                                     | 7447.5                                   | 0.8755                                           | 3.41445                                | 48                      | 6548.5                                   | 6555.5                                   | 0.531                                            | 2.7081                                 |
| IG psaC-ndhE | 232               | 111908                      | 112470                    | 37                           | 8871                                     | 1359                                     | 6.496                                  | 39                      | 580                                      | 1797                                     | 0.656                                            | 2.5584                                 | 38                      | 5347                                     | 15648                                    | 0.33                                             | 1.683                                  |
| ndhE-ndhG    | 233               | 112660                      | 113160                    | 48                           | 1751                                     | 777                                      | 4.2595                                 | 32                      | 2617.5                                   | 1028.5                                   | 1.2425                                           | 4.84575                                | 43                      | 1728                                     | 6143                                     | 0.521                                            | 2.6571                                 |
| ndhG 3'      | 234               | 112880                      | 113273                    | 48                           | 2177.5                                   | 658.5                                    | 3.161                                  | 26                      | 4929.5                                   | 1001                                     | 1.12                                             | 4.368                                  | 44                      | 1944                                     | 2697                                     | 1.0455                                           | 5.33205                                |
| ndhG-IG      | 235               | 113158                      | 113735                    | 48                           | 1601.5                                   | 499.5                                    | 3.052                                  | 35                      | 3000                                     | 919                                      | 1.174                                            | 4.5786                                 | 45                      | 1537                                     | 2744                                     | 1.059                                            | 5.4009                                 |
| IG-ndhI      | 236               | 113471                      | 114240                    | 48                           | 1850                                     | 738.5                                    | 5.91                                   | 42                      | 1403.5                                   | 1361                                     | 1.111                                            | 4.3329                                 | 46                      | 1897                                     | 2988                                     | 0.997                                            | 5.0847                                 |
| ndhAex2      | 237               | 114196                      | 114891                    | 48                           | 3227.5                                   | 1351                                     | 3.432                                  | 22                      | 4237                                     | 3619                                     |                                                  |                                        | 47                      | 3151                                     | 5607                                     | 1.008                                            | 5.1408                                 |
| ndhAex2-in   | 238               | 114341                      | 115730                    | 44                           | 1225.5                                   | 781                                      | 1.473                                  | 38                      | 959                                      | 2512                                     | 0.8675                                           | 3.38325                                | 38                      | 1009.5                                   | 1388.5                                   | 1.158                                            | 5.9058                                 |
| ndhAin       | 239               | 114941                      | 115914                    | 48                           | 1345                                     | 1233.5                                   | 3.0295                                 | 22                      | 6151.5                                   | 6330                                     |                                                  |                                        | 45                      | 1965                                     | 3792                                     | 0.651                                            | 3.3201                                 |
| ndhAin-ex1   | 240               | 115620                      | 116210                    | 48                           | 762.5                                    | 335.5                                    | 2.6135                                 | 21                      | 3020                                     | 3728                                     |                                                  |                                        | 31                      | 569                                      | 2062                                     | 0.95                                             | 4.845                                  |
| ndhAex1-ndhH | 241               | 115951                      | 117067                    | 41                           | 652                                      | 127                                      | 3.526                                  | 39                      | 1492                                     | 1359                                     | 1.088                                            | 4.2432                                 | 31                      | 337                                      | 559                                      | 1.008                                            | 5.1408                                 |
| ndhH         | 242               | 116363                      | 117650                    | 48                           | 2038.5                                   | 513.5                                    | 3.634                                  | 32                      | 2165.5                                   | 608.5                                    | 1.153                                            | 4.4967                                 | 45                      | 1564                                     | 2244                                     | 0.813                                            | 4.1463                                 |
| ndhH-rps15   | 243               | 116955                      | 117800                    | 48                           | 1403.5                                   | 496                                      | 2.015                                  | 41                      | 6718                                     | 9465                                     | 0.736                                            | 2.8704                                 | 44                      | 997.5                                    | 2508                                     | 0.8345                                           | 4.25595                                |
| rps19-psbA   | 244               | 140277                      | 336                       | 48                           | 6730.5                                   | 6236.5                                   | 2.1705                                 | 0                       |                                          |                                          |                                                  |                                        | 48                      | 9249.5                                   | 17419.5                                  | 0.4125                                           | 2.10375                                |

1 genome position on maize chloroplast chromosome (accession No. NC\_001666)

2 each probe is spotted with 12 replications per chip, which leads to a maximum of 48 spots per probe across all four replicates. Probes with less than 24 detectable spots were not considered in the analysis and thus appear as gaps in the graphs in figure 2a.

3 (F635 Median - B635) = the median spot pixel intensity at wavelength 635 nm with the median background subtracted. This calculation is performed by the GenePix Pro 7.0 software (Axon Instruments) for each spot on the arrays. We then calculate the median of all the (F635 Median - B635) values, which is maximum 48 spots across all four biological replicate experiments. The same applies to the signal in the other wavelength analyzed (Median (F532 Median - B532)).

4 in case of data from mature chloroplasts, the MEV and the Median (Median of Ratios (635/532)) are identical. In case of greening and etiolated plastids, the MEV is derived from the Median (Median of Ratios (635/532)) by normalization against the Median (Median of Ratios (635/532)) from experiments with mature chloroplasts (against the sum of all Median (Median of Ratios (635/532)) values of all probes on the arrays that have a signal above background). The Median of Ratios (635/532) itself is calculated by the GenePix Pro 7.0 software (Axon Instruments) by taking the median of all the red (635 nm) over green (532 nm) ratios of each pixel within a spot area. Afterwards, the median of this Median of Ratios (635/532) of all spots across the four replicate microarray analyses is calculated. Since we have included four microarray experiments each with 12 replicate spots for each PCR product, this amounts maximum to 48 spots per PCR product.
