# Supplementary material for: Stable Membrane-Association of mRNAs in Etiolated, Greening and Mature Plastids
Source: MDPI journal article supplement (doi:10.3390/ijms18091881), 2017-08-31
Supplement: s1 [file s1]

Table S4: List of oligonucleotides

| Name            | Sequence (5' to 3')                          | Purpose                                    |
|-----------------|----------------------------------------------|--------------------------------------------|
| Ck_psbD_for     | CTATTCGCTTTAGGGGGTTGG                        | riboprobe for <i>psbD</i>                  |
| Ck_psbD_T7_rev  | TAATACGACTCACTATAGGGCAGCAATGGGACCAGAGAATGC   |                                            |
| SK_psbAex1forw. | ACCGTCTTTACATTGGATGG                         | riboprobe for <i>psbA</i>                  |
| psbA_zm.T7      | GTAATCGACTCACTATAGGGTACCAGATATTCCTAAAGGC     |                                            |
| psbB.rp         | TTTGCAGCTTTTGTGTGTC                          | riboprobe for <i>psbB</i>                  |
| psbB.T7         | GTAATACGACTCACTATAGGGCTTCTAAACGGGACGTCAGC    |                                            |
| petA.43.for     | CTCGCTCCATATCTGTCTCACTC                      | riboprobe for <i>petA</i>                  |
| petA.381.T7.rev | TAATACGACTCACTATAGGGCTCGGGTGAAATACGATCG      |                                            |
| CK_rps16_for    | CGATGTGGTAGAAAGCAACG                         | riboprobe for <i>rps16</i>                 |
| CK_rps16_T7     | GTAATACGACTCACTATAGGGCATTCCGTAAAAATCCCAGC    |                                            |
| Zmrrn16fw       | GCTCAGGATGAACGCTGGCG                         | double-stranded DNA probe for <i>rrn16</i> |
| Zmrrn16rev      | CATCCTCTGTCTTACCGCGGC                        |                                            |
| psaC.rp         | CTTGATAGGATGTACTCAATGTGTC                    | riboprobe for <i>psaC</i>                  |
| psaC.T7         | GTAATCGACTCACTATAGGGCCATACTTCGAGTTGTTTCATGC  |                                            |
| Zmrrn5fw        | TATTCTGGTGTCTAGGCGTAG                        | double-stranded DNA probe for <i>rrn5</i>  |
| Zmrrn5rev       | ATTCTGGCATCGAGCTATTTTGC                      |                                            |
| CK_rbcL_for     | GCAGCATTCCGAGTAACTCC                         | riboprobe for <i>rbcL</i>                  |
| CK_rbcL_T7      | GTAATACGACTCACTATAGGGCCACGTAGACATTCATAAACTGC |                                            |
| Zm_atpHfor      | TTTGACACGAGGAACTCATC                         | riboprobe for <i>atpH</i>                  |
| Zm_atpHrev_T7   | GTAATACGACTCACTATAGGGCAAATAAAAGCGCTAGTGC     |                                            |
