# Supplementary material for: Stable Membrane-Association of mRNAs in Etiolated, Greening and Mature Plastids
Source: MDPI journal article supplement (doi:10.3390/ijms18091881), 2017-08-31
Supplement: s1 [file s1]

Table S3: 20% least membrane-enriched mRNAs in chloroplast membrane preparations

| mature              |                         |                                        | greening     |                         |                                        | etiolated       |                         |                                        |
|---------------------|-------------------------|----------------------------------------|--------------|-------------------------|----------------------------------------|-----------------|-------------------------|----------------------------------------|
| Probe name          | spot count <sup>1</sup> | Membrane enrichment value <sup>2</sup> | Probe name   | spot count <sup>1</sup> | Membrane enrichment value <sup>2</sup> | Probe name      | spot count <sup>1</sup> | Membrane enrichment value <sup>2</sup> |
| orf99-137           | 30                      | 0.2025                                 | petN         | 42                      | 1.2948                                 | rpl22           | 48                      | 0.6375                                 |
| orf241              | 24                      | 0.203                                  | atpA-3'      | 42                      | 1.40205                                | orf58           | 28                      | 0.89505                                |
| orf46-34-241        | 27                      | 0.21                                   | petN-IG      | 37                      | 1.404                                  | orf69-IG        | 24                      | 0.93075                                |
| orf99               | 25                      | 0.256                                  | petG         | 42                      | 1.69065                                | petG            | 48                      | 1.00725                                |
| orf38-99            | 29                      | 0.277                                  | IG psbM-petN | 36                      | 1.76085                                | matK            | 26                      | 1.08885                                |
| orf58               | 27                      | 0.288                                  | rpl22        | 42                      | 1.7745                                 | petL            | 37                      | 1.1934                                 |
| rpoC2-1             | 24                      | 0.3325                                 | IG-rps16 ex2 | 42                      | 1.79985                                | rpoC2-1         | 26                      | 1.2189                                 |
| IGrps12-orf58-2     | 24                      | 0.3335                                 | rbcl 5'      | 42                      | 1.8174                                 | psaJ            | 37                      | 1.2648                                 |
| rpl2ex1-rpl23       | 42                      | 0.467                                  | ndhF-rpl32   | 42                      | 1.85055                                | psbA 3'         | 48                      | 1.27245                                |
| rpl22               | 48                      | 0.6455                                 | rps16 full   | 42                      | 1.9305                                 | IG-rps16 ex2    | 48                      | 1.37445                                |
| rpl2in              | 45                      | 0.698                                  | psbM-IG      | 30                      | 1.94805                                | psbA 5'         | 48                      | 1.54275                                |
| rpl23               | 47                      | 0.7                                    | IG-psaJ-IG   | 42                      | 1.95975                                | trnM-atpE-atpB  | 26                      | 1.58865                                |
| matK                | 24                      | 0.756                                  | psaC         | 42                      | 1.9617                                 | IG psaC-ndhE    | 38                      | 1.683                                  |
| ndhBin-2            | 47                      | 0.756                                  | rbcl         | 40                      | 1.98315                                | orf241          | 29                      | 1.7136                                 |
| clpP-1              | 42                      | 0.7895                                 | atpB         | 39                      | 2.2035                                 | psbM-IG         | 38                      | 1.72125                                |
| rbcl                | 48                      | 0.7995                                 | psbJLFE      | 42                      | 2.27955                                | clpP-1          | 35                      | 1.7289                                 |
| rps16 in            | 45                      | 0.87                                   | IG-orf63     | 35                      | 2.2971                                 | ndhBex2-in      | 37                      | 1.7442                                 |
| rpl16in-ex1         | 33                      | 0.966                                  | psbA         | 36                      | 2.38875                                | atpA-3'         | 48                      | 1.75695                                |
| psbA 5'             | 47                      | 0.987                                  | IG-psbK      | 42                      | 2.39265                                | IG-psaJ-IG      | 48                      | 1.79775                                |
| psbA                | 48                      | 0.988                                  | orf99-137    | 25                      | 2.4024                                 | orf139          | 30                      | 1.8105                                 |
| rpl2in-ex1          | 47                      | 1.012                                  | rbcl 3'      | 37                      | 2.4063                                 | orf46-34-241    | 28                      | 1.8105                                 |
| infA                | 32                      | 1.0125                                 | ndhBin-1     | 40                      | 2.43165                                | petN-IG         | 47                      | 1.887                                  |
| rpl33               | 45                      | 1.014                                  | psbA 3'      | 42                      | 2.43165                                | rpl2in          | 41                      | 1.9023                                 |
| IG psbM-petN        | 48                      | 1.016                                  | psaJ         | 28                      | 2.52135                                | petN            | 48                      | 1.9431                                 |
| IG-psaI-1           | 24                      | 1.0275                                 | IG atpB-rbcl | 42                      | 2.54475                                | rps12ex2-in1    | 42                      | 1.9788                                 |
| petN-IG             | 48                      | 1.133                                  | ndhE-ndhG    | 39                      | 2.5584                                 | orf99-137       | 39                      | 2.0043                                 |
| atpA-5'             | 48                      | 1.1445                                 | psaJ-rpl33   | 43                      | 2.5623                                 | IGrps12-orf58-2 | 26                      | 2.0196                                 |
| petN                | 48                      | 1.2615                                 | rps16 in     | 27                      | 2.574                                  | rpl2in-ex1      | 48                      | 2.0196                                 |
| petG                | 48                      | 1.3605                                 |              |                         |                                        | psbA            | 48                      | 2.04                                   |
| rps8                | 47                      | 1.366                                  |              |                         |                                        | rpl14           | 34                      | 2.06295                                |
| atpFex1-2           | 48                      | 1.4465                                 |              |                         |                                        | infA            | 29                      | 2.0655                                 |
| rps8-rpl14-rpl16ex2 | 48                      | 1.469                                  |              |                         |                                        | rps19-psbA      | 48                      | 2.10375                                |
| ndhAex2-in          | 44                      | 1.473                                  |              |                         |                                        | atpB 5'         | 36                      | 2.13945                                |
| psbJ                | 48                      | 1.482                                  |              |                         |                                        | rps18           | 38                      | 2.14965                                |

Colour code

Photosystem I

Photosystem II

Cytochrome *b<sub>6</sub>f* complex

NADH dehydrogenase

ATP Synthase

mixed probes

ribosomal proteins

tRNAs

rRNAs

Open reading frames with unknown functions

miscellaneous genes

1 each probe is spotted with 12 replications per chip, which leads to a maximum of 48 spots per probe across all four replicates. Probes with less than 24 detectable spots were not considered in the analysis and thus appear as gaps in the graphs in figure 2A.

2 In case of data from mature chloroplasts, the MEV and the Median (Median of Ratios (635/532)) are identical. In case of greening and etiolated plastids, the MEV is derived from the Median (Median of Ratios (635/532)) by normalization against the Median (Median of Ratios (635/532)) from experiments with mature chloroplasts (against the sum of all Median (Median of Ratios (635/532)) values of all probes on the arrays that have a signal above background). The Median of Ratios (635/532) itself is calculated by the GenePix Pro 7.0 software (Axon Instruments) by taking the median of all the red (635 nm) over green (532 nm) ratios of each pixel within a spot area. Afterwards, the median of this Median of Ratios (635/532) of all spots across the four replicate microarray analyses is calculated. Since we have included four microarray experiments with each carrying 12 replicate spots of each PCR product, this amounts maximum to 48 spots.
